# Supplementary material for: Success of Montreal Protocol Demonstrated by Comparing High-Quality UV Measurements with “World Avoided” Calculations from Two Chemistry-Climate Models
Source: PubMed Central journal article supplement (PMC6722083; doi:10.1038/s41598-019-48625-z), 2019-09-03

## Success of Montreal Protocol Demonstrated by Comparing High-Quality UV Measurements with “World Avoided” Calculations from Two Chemistry-Climate Models

Richard McKenzie, Germar Bernhard, Ben Liley, Patrick Disterhoft, Steve Rhodes, Alkiviadis Bais, Olaf Morgenstern, Paul Newman, Luke Oman, Colette Brogniez, Stana Simic

### Supplementary Data

The supplementary data consists of:

| <b>Page</b> | <b>Content</b>                                                                                                                                                                                                                                                                                                                                                                                                                                                                                                                                                                                                                               |
|-------------|----------------------------------------------------------------------------------------------------------------------------------------------------------------------------------------------------------------------------------------------------------------------------------------------------------------------------------------------------------------------------------------------------------------------------------------------------------------------------------------------------------------------------------------------------------------------------------------------------------------------------------------------|
| 2 – 5       | Four multi-panel figures comparing measured (Scenario (1)) and projected (Scenarios (2) – (4)) long-term changes in total ozone columns (TOCs) at each of the 17 sites discussed in the paper. The 4 pages show results for each season (winter, spring, summer, autumn). Numbers shown on each panel indicate for each scenario the average TOC in Dobson Units, calculated over the 10-year reference period 1978-1987. The percentage difference between the average TOCs of the three models (NIWA-UKCA, World Expected; NIWA-UKCA, World Avoided; and GEOS-CCM, World avoided) and the average of the measured TOCs are also indicated. |
| 6 – 22      | 17 multi-panel plots showing time series for ozone and UVI changes, similar to Figure 3 in the paper. Each of the 17 pages shows results for a different site.                                                                                                                                                                                                                                                                                                                                                                                                                                                                               |
| 23 – 26     | Four multi-panel plots comparing measured and projected long term changes in UVI at each of the 17 sites, similar to Figure 4 in the paper. The four pages show results for each season (winter, spring, summer, autumn).                                                                                                                                                                                                                                                                                                                                                                                                                    |

### Northern Hemisphere Winter

### Southern Hemisphere Winter

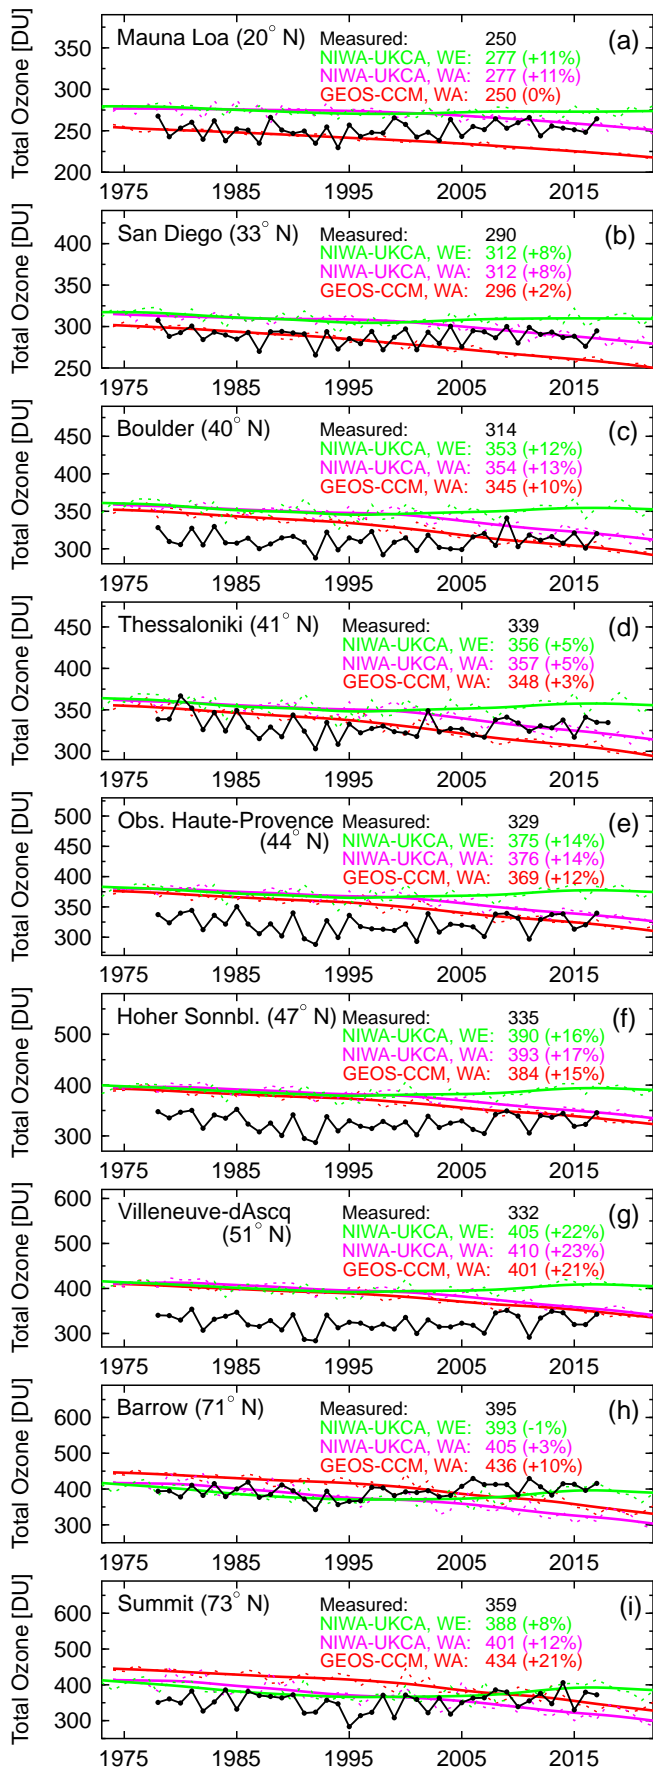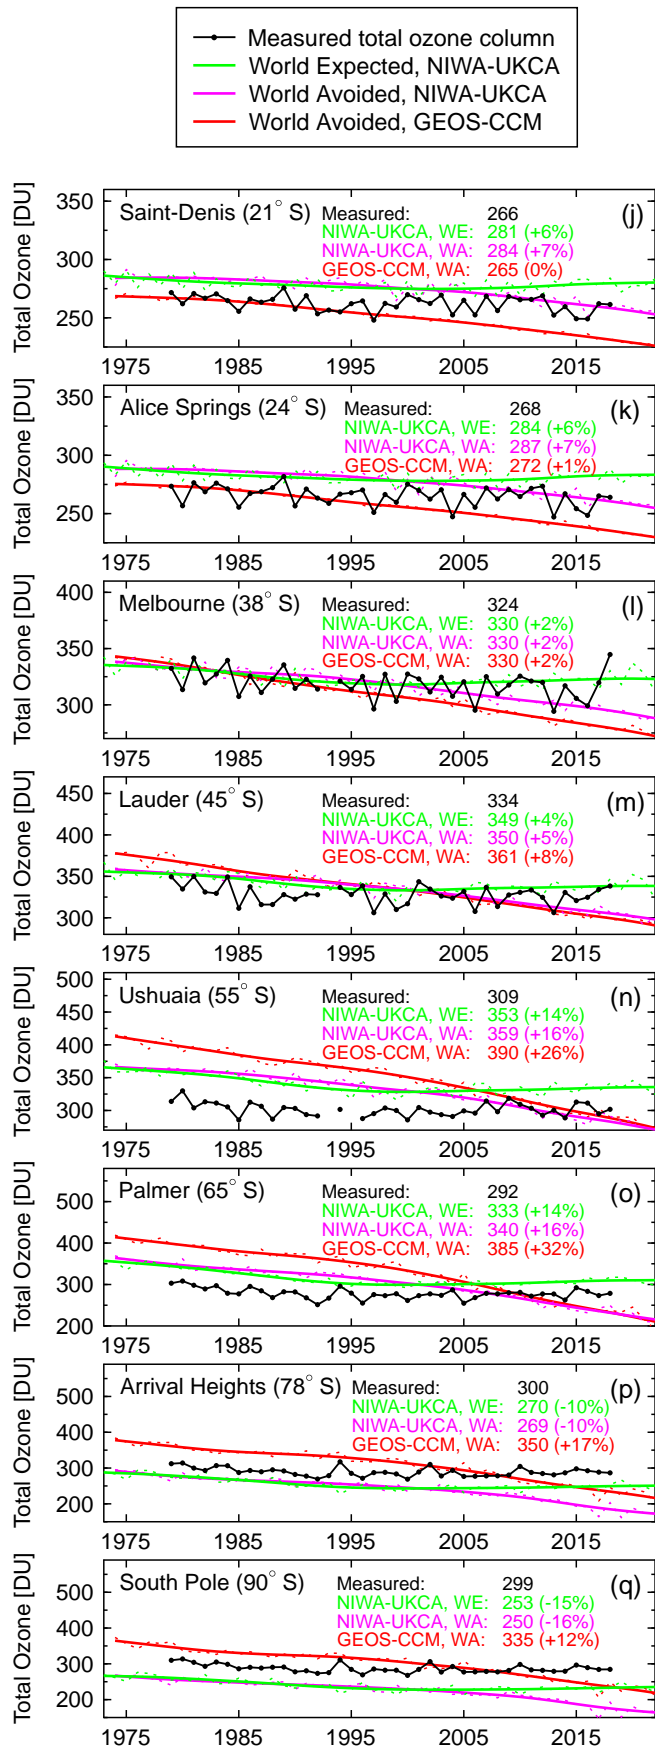

— Measured total ozone column  
 — World Expected, NIWA-UKCA  
 — World Avoided, NIWA-UKCA  
 — World Avoided, GEOS-CCM

### Northern Hemisphere Spring

### Southern Hemisphere Spring

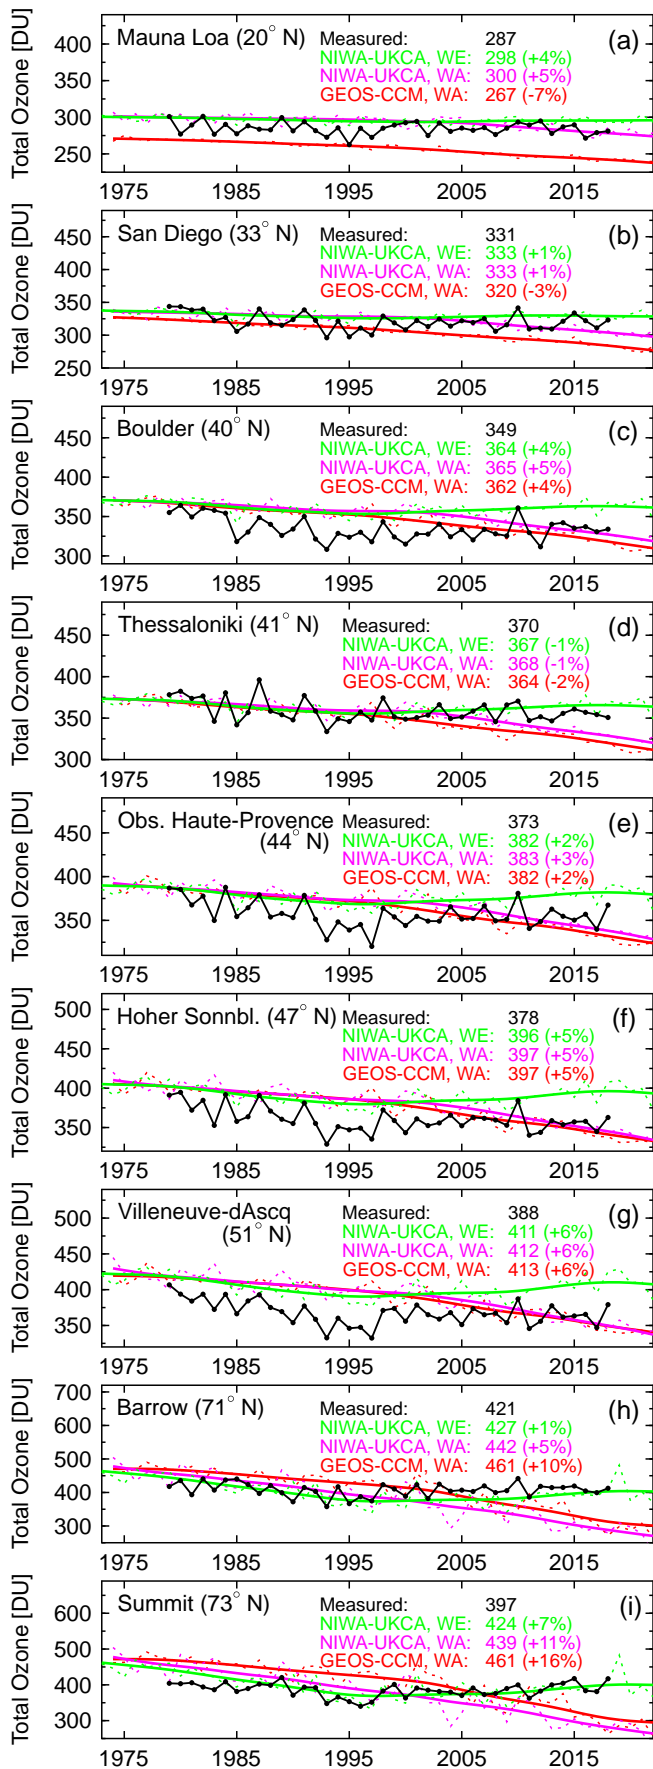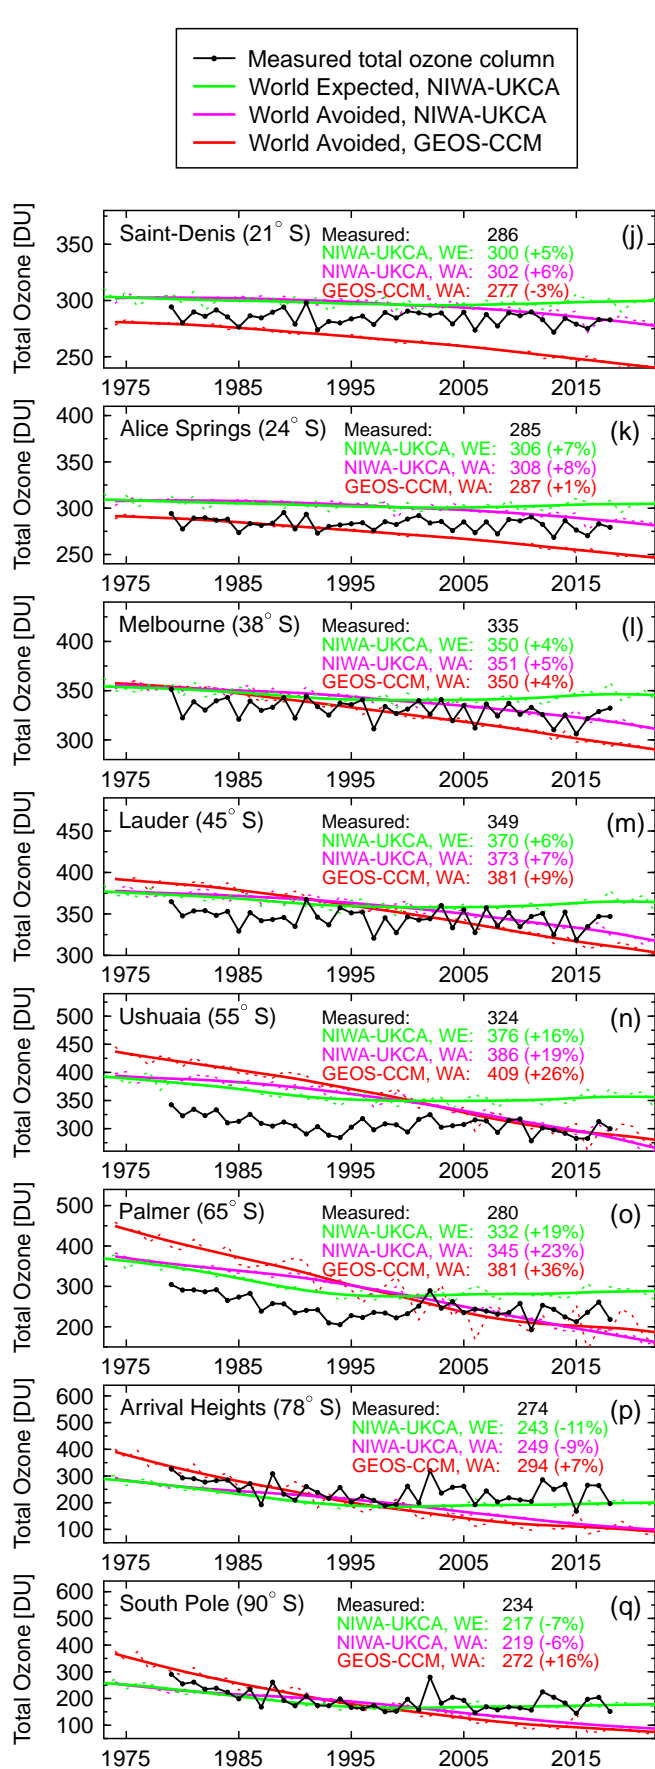

### Northern Hemisphere Summer

### Southern Hemisphere Summer

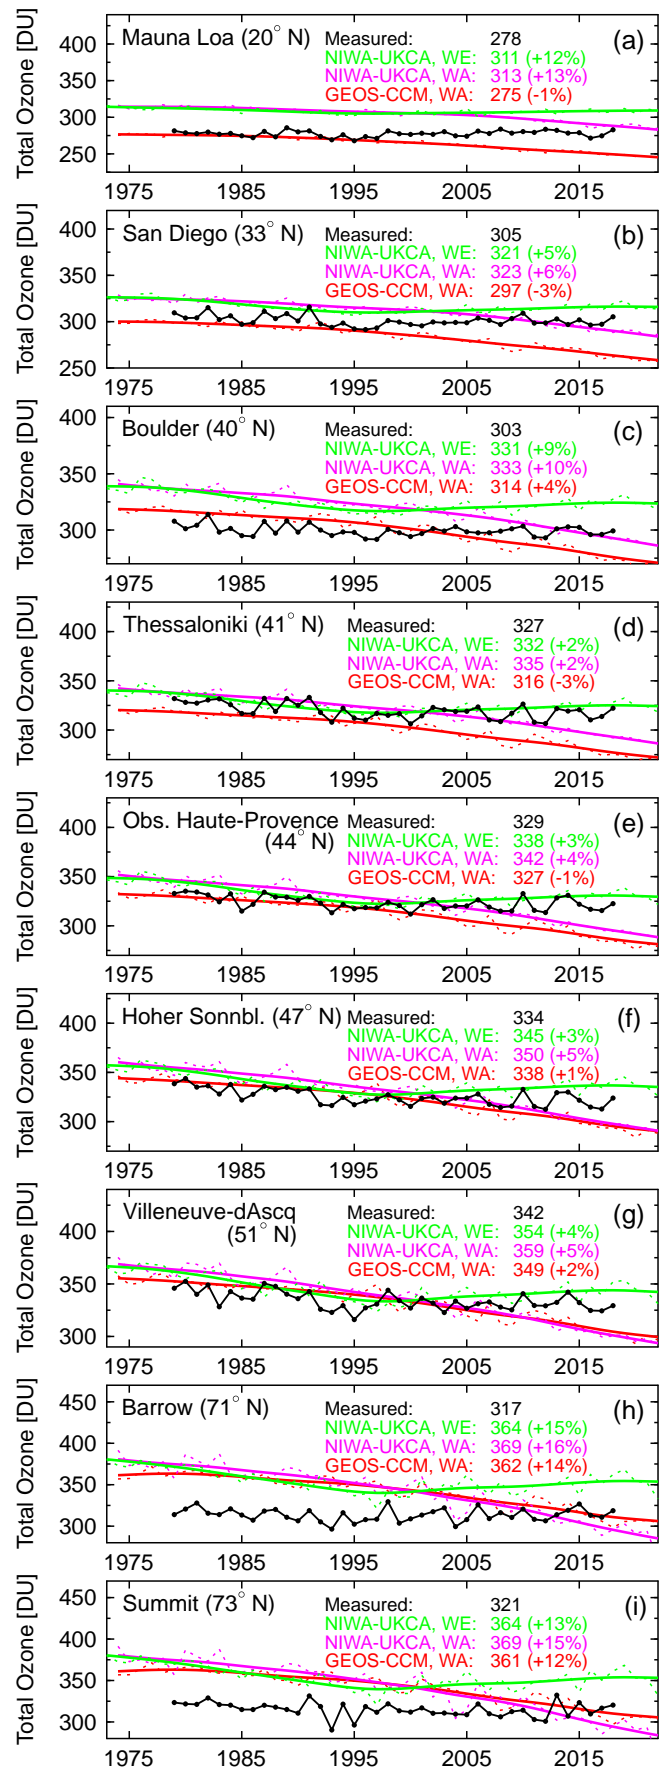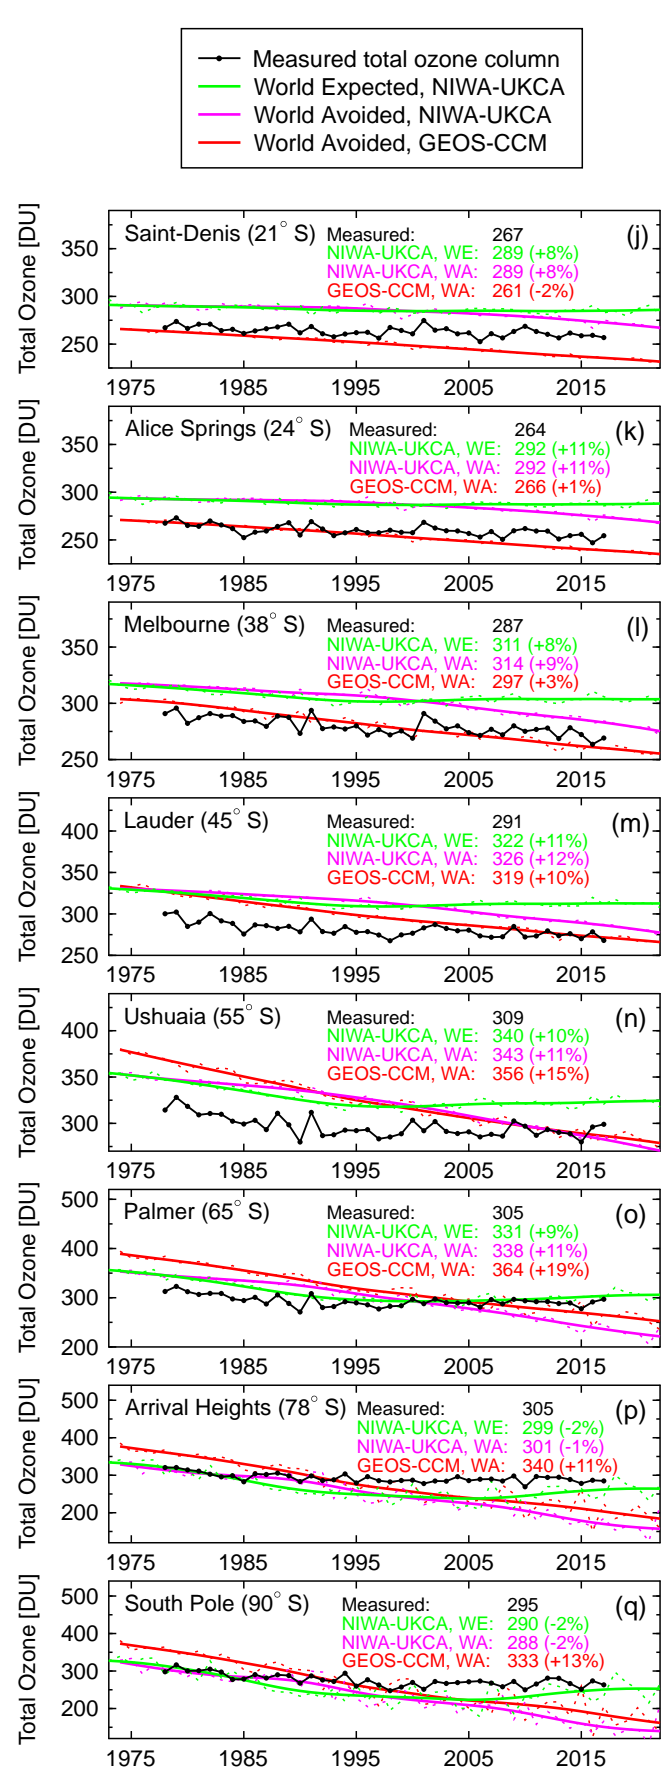

### Northern Hemisphere Autumn

### Southern Hemisphere Autumn

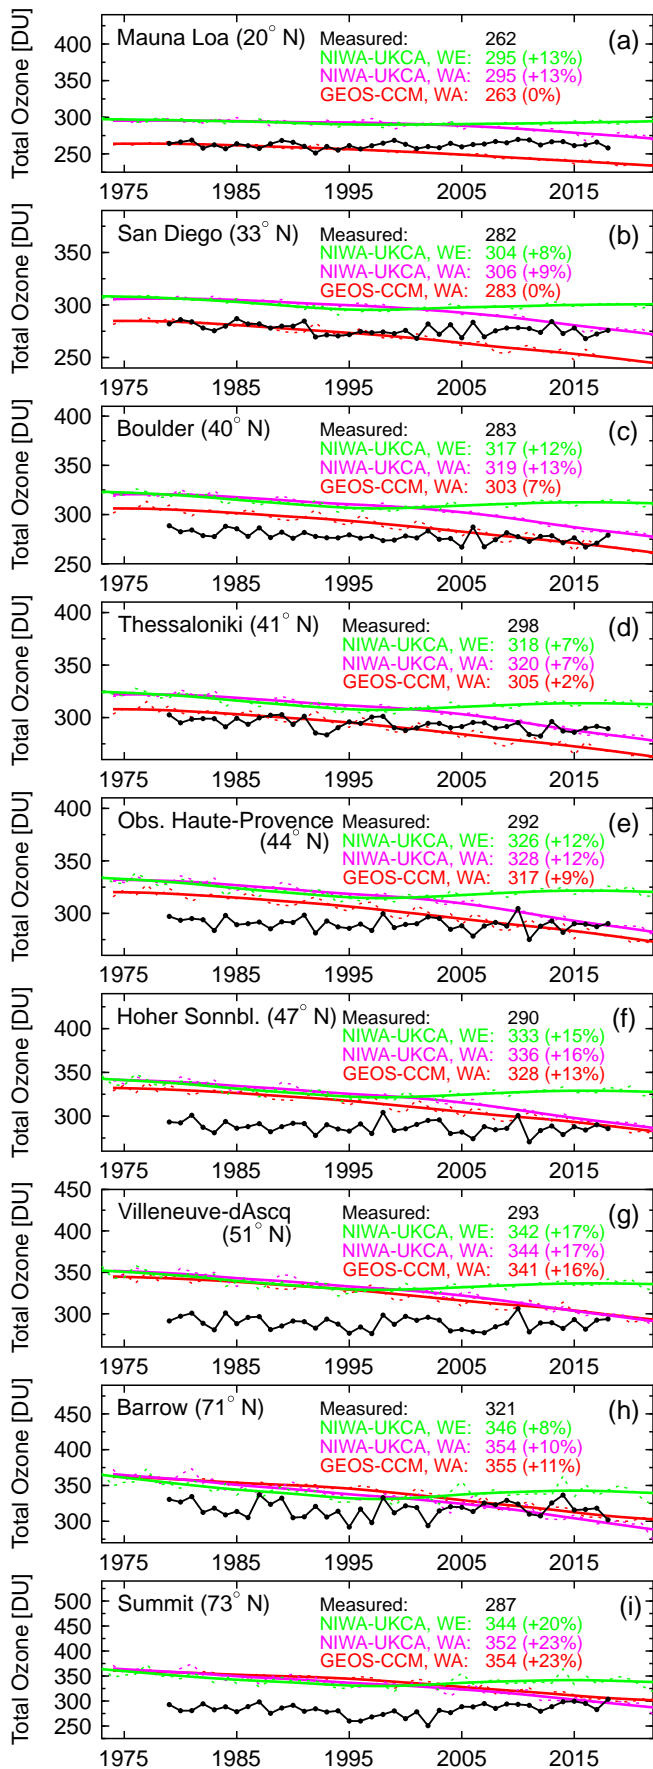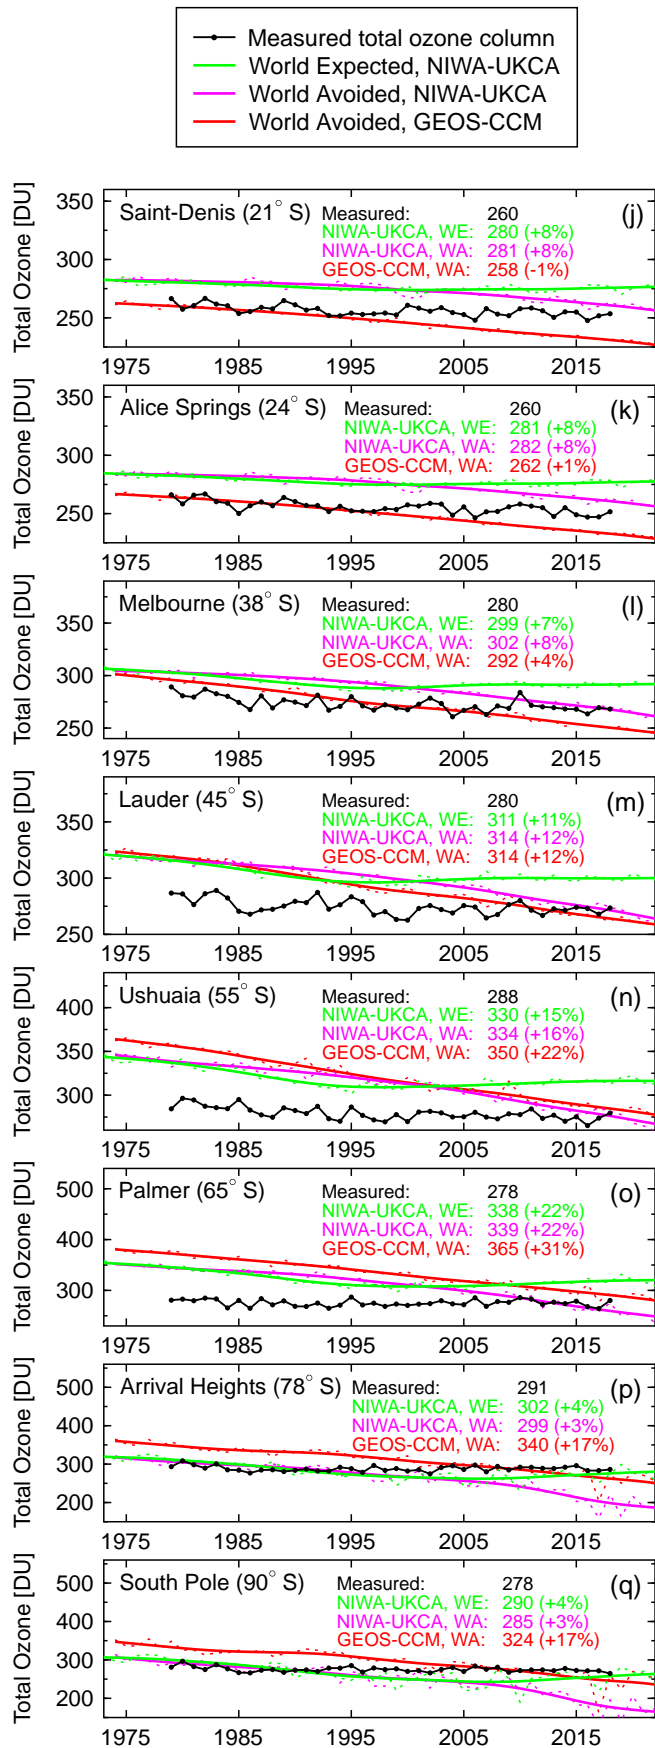

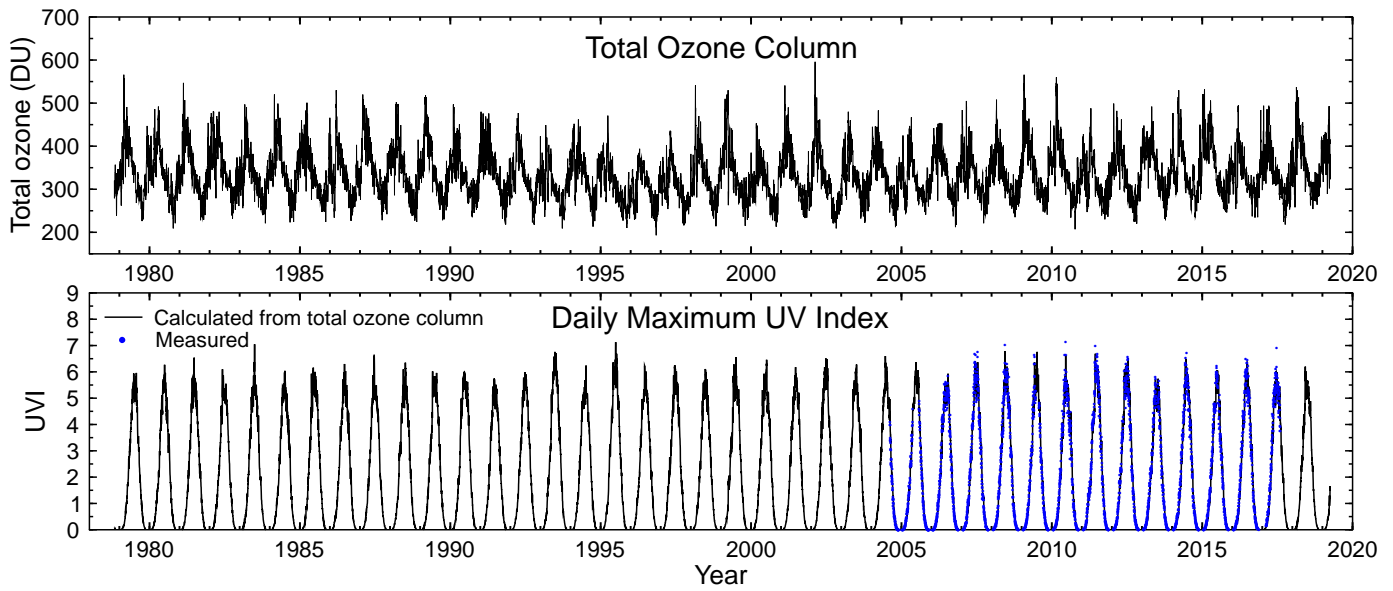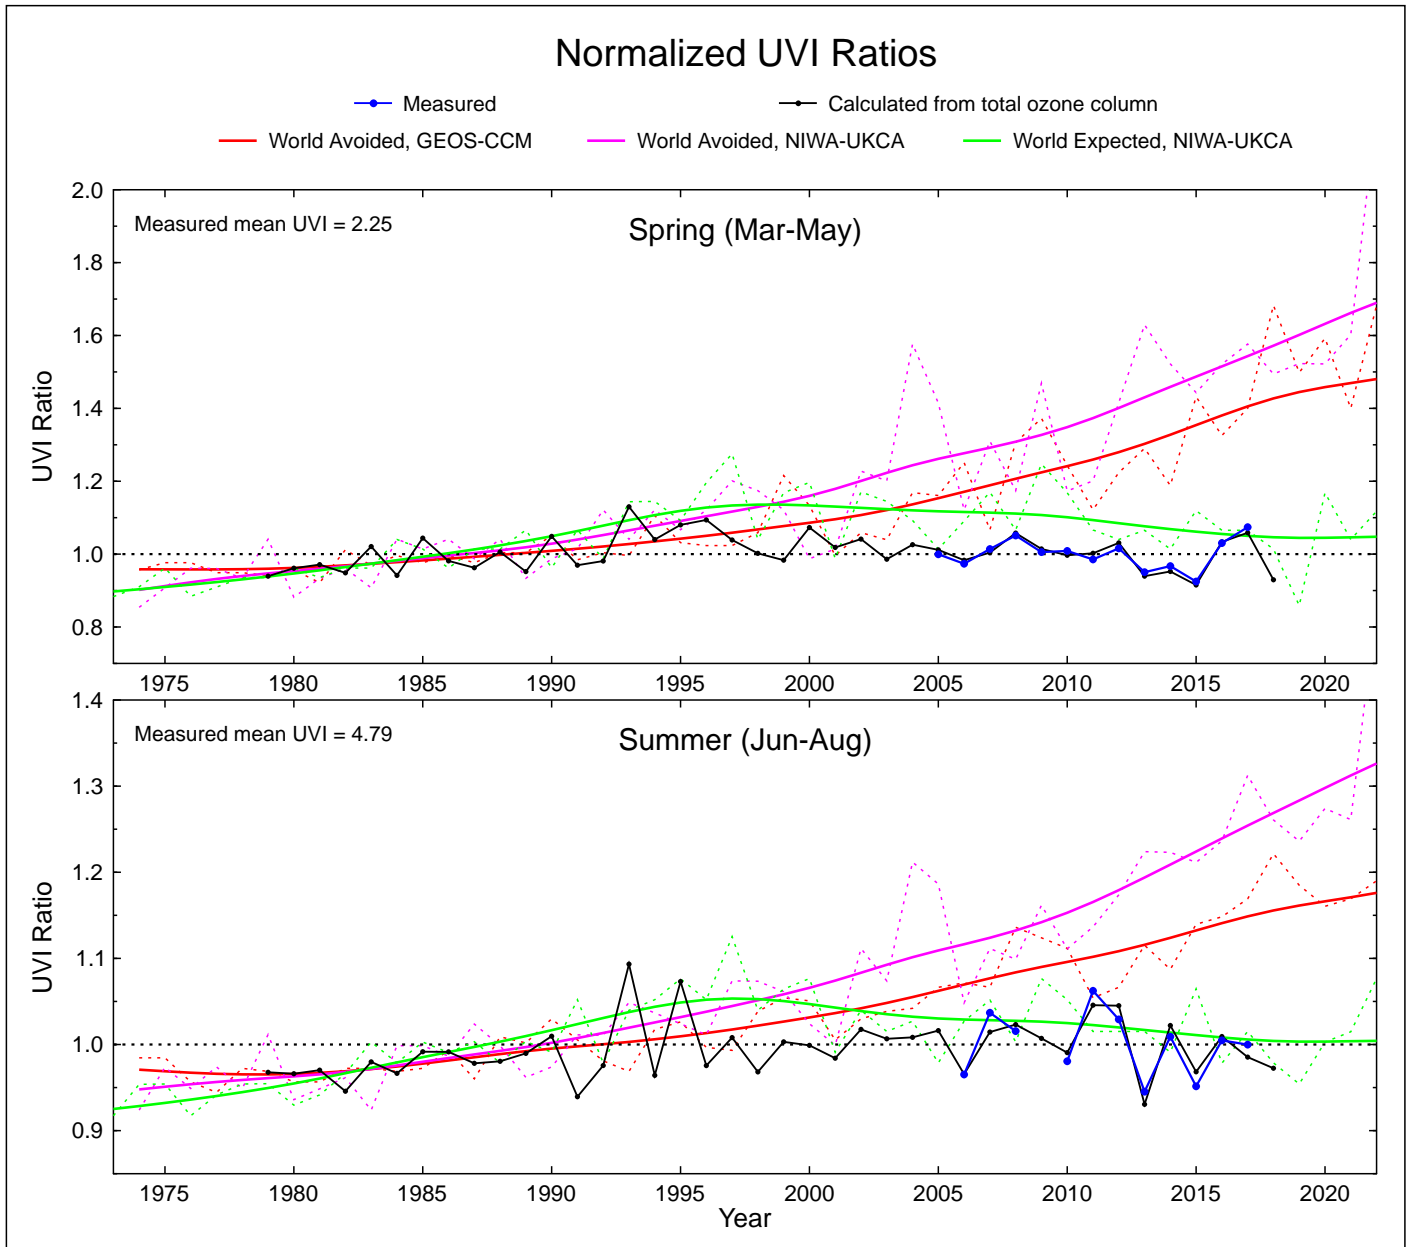

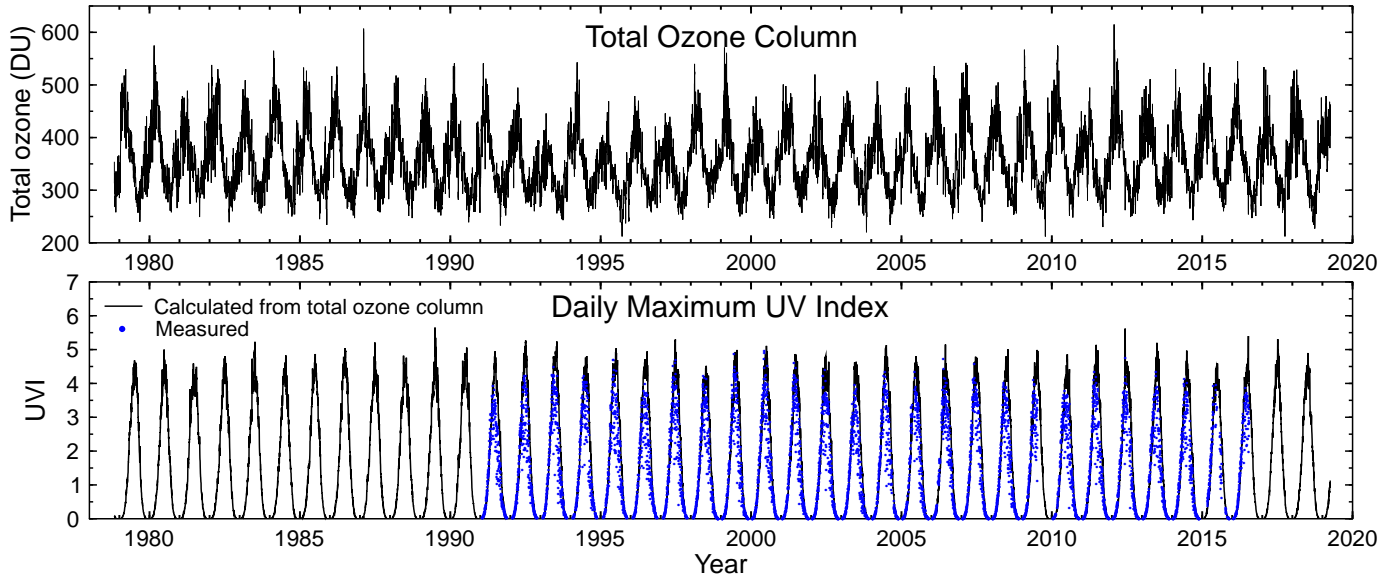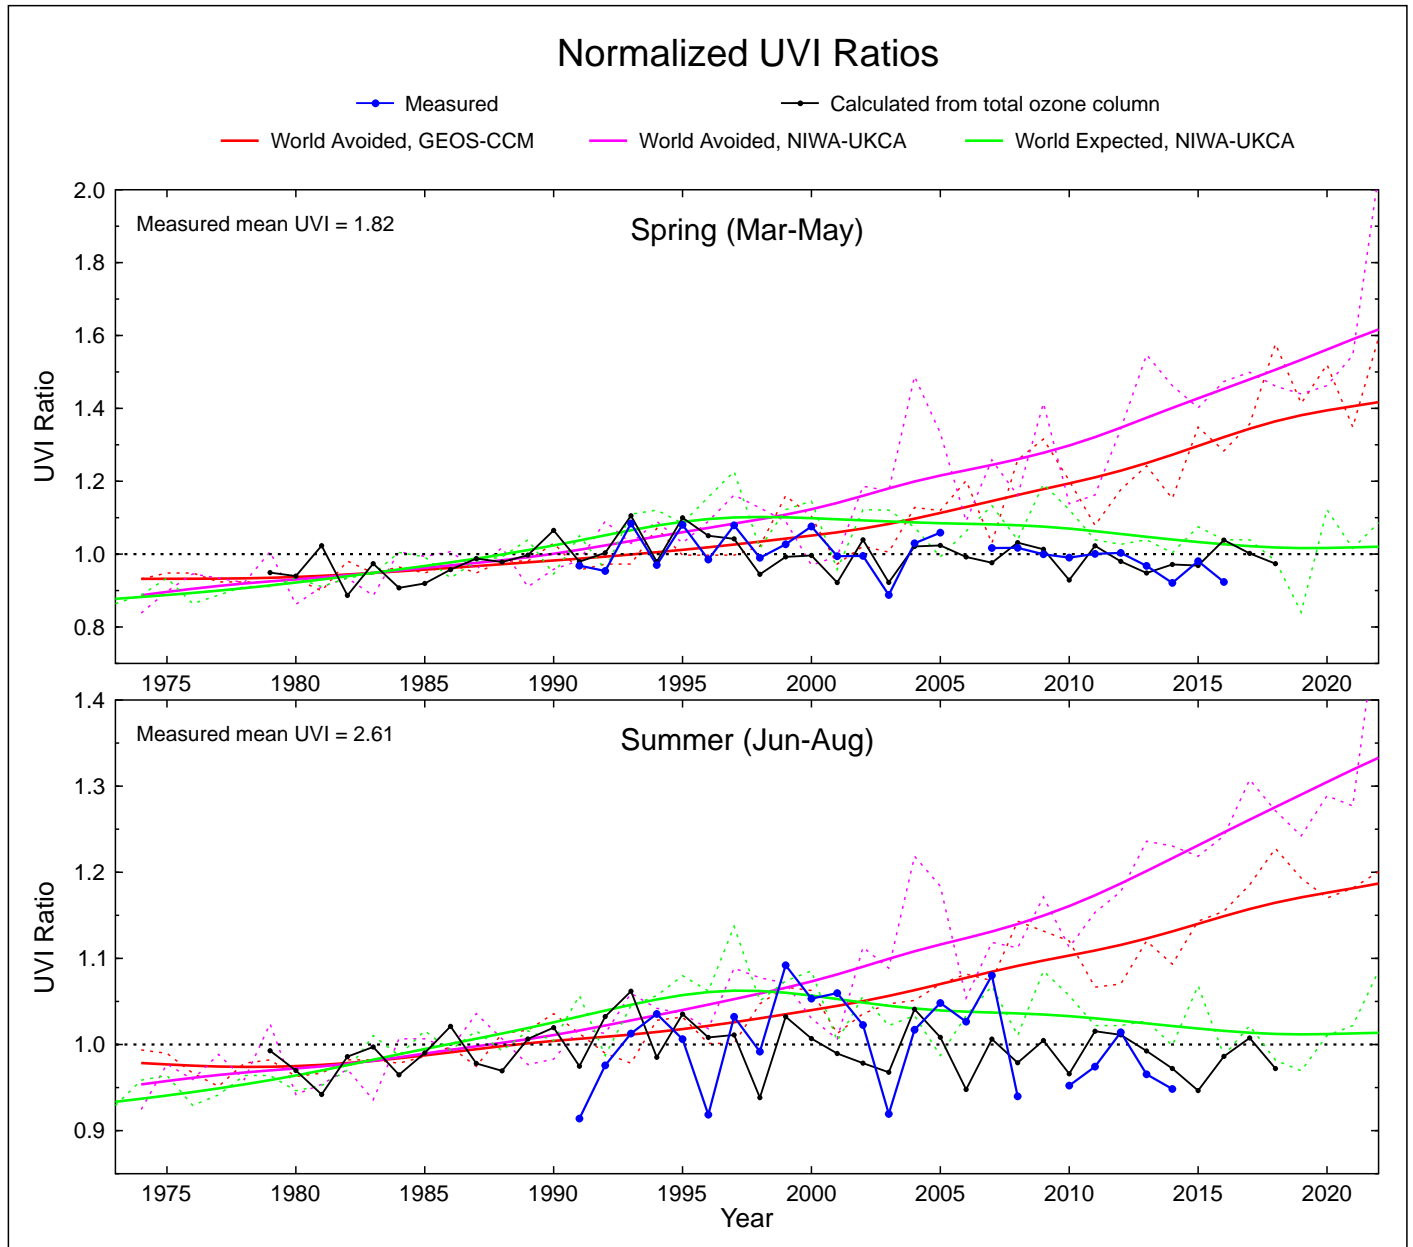

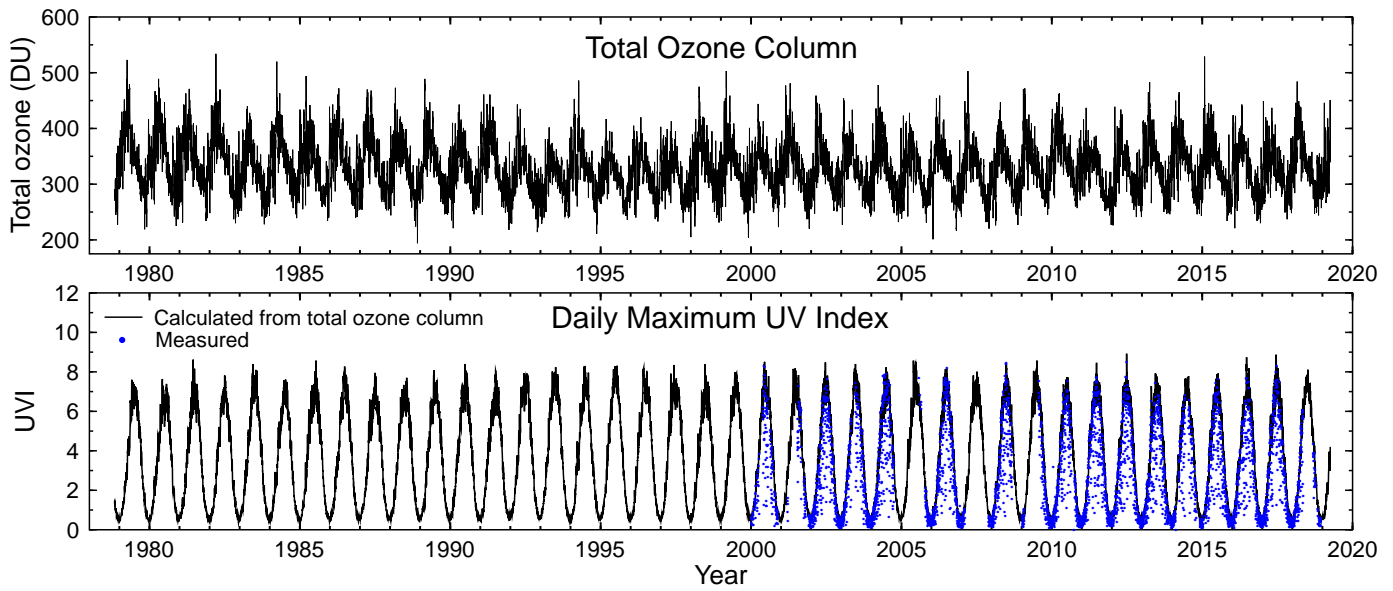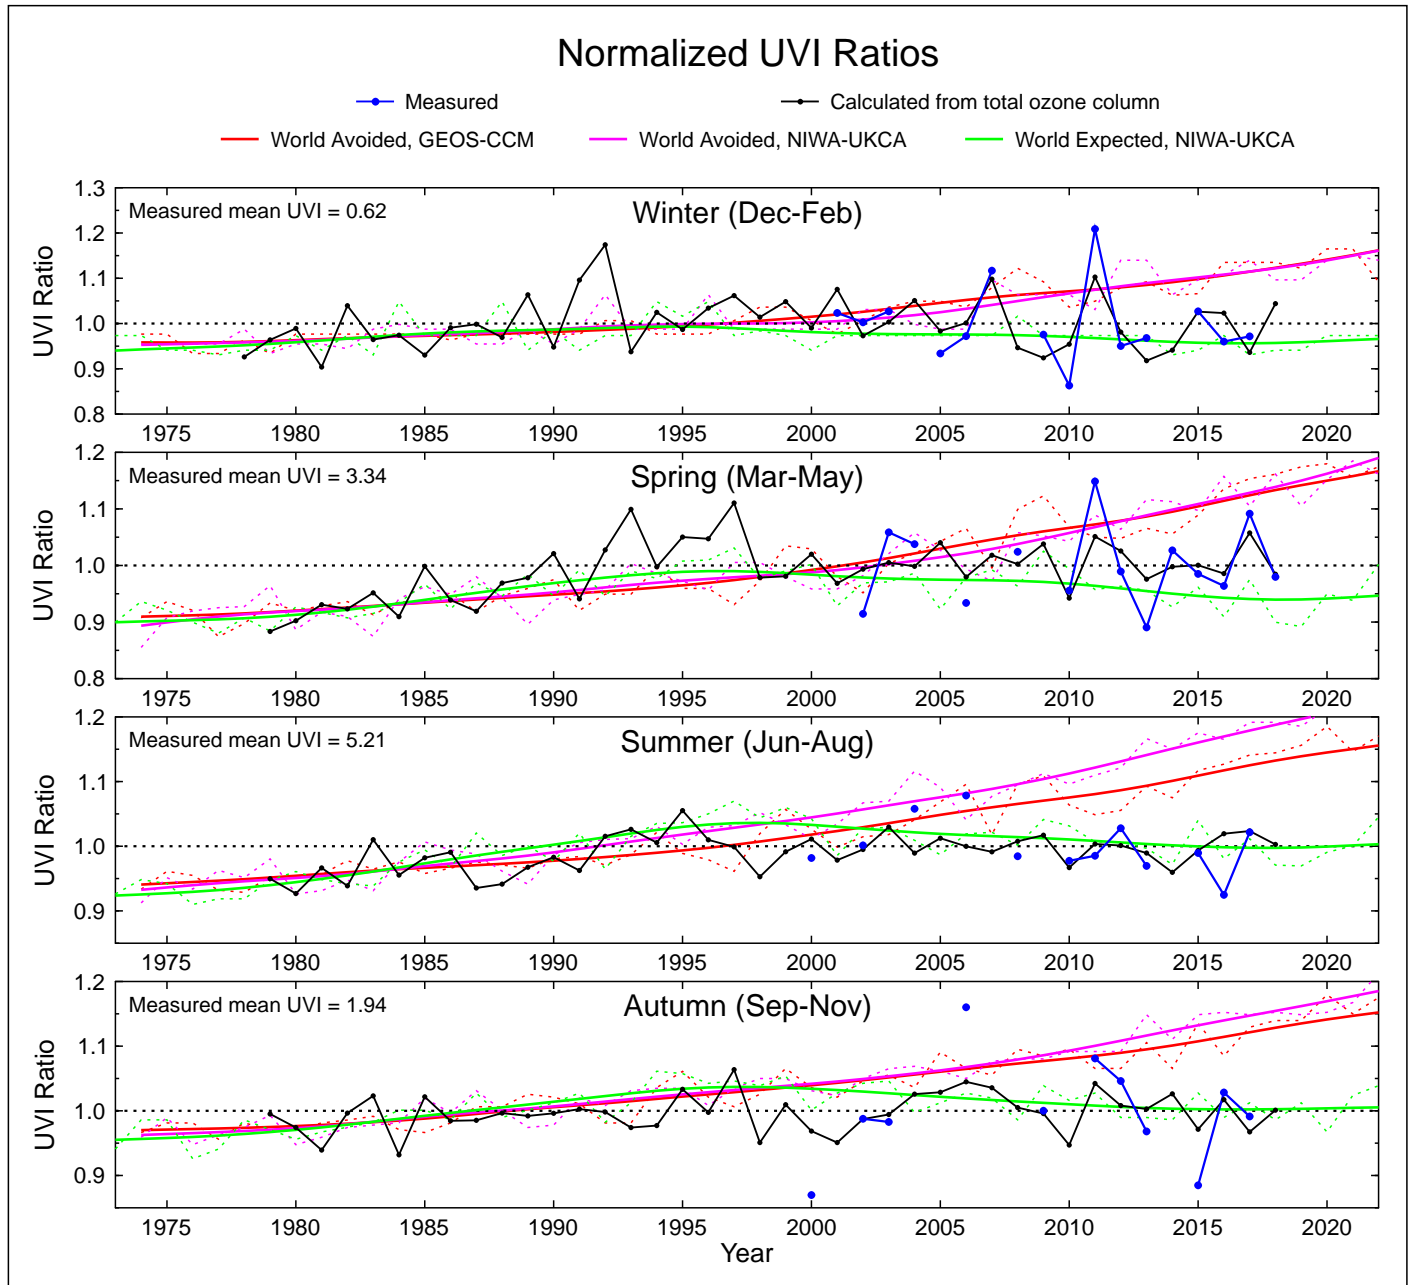



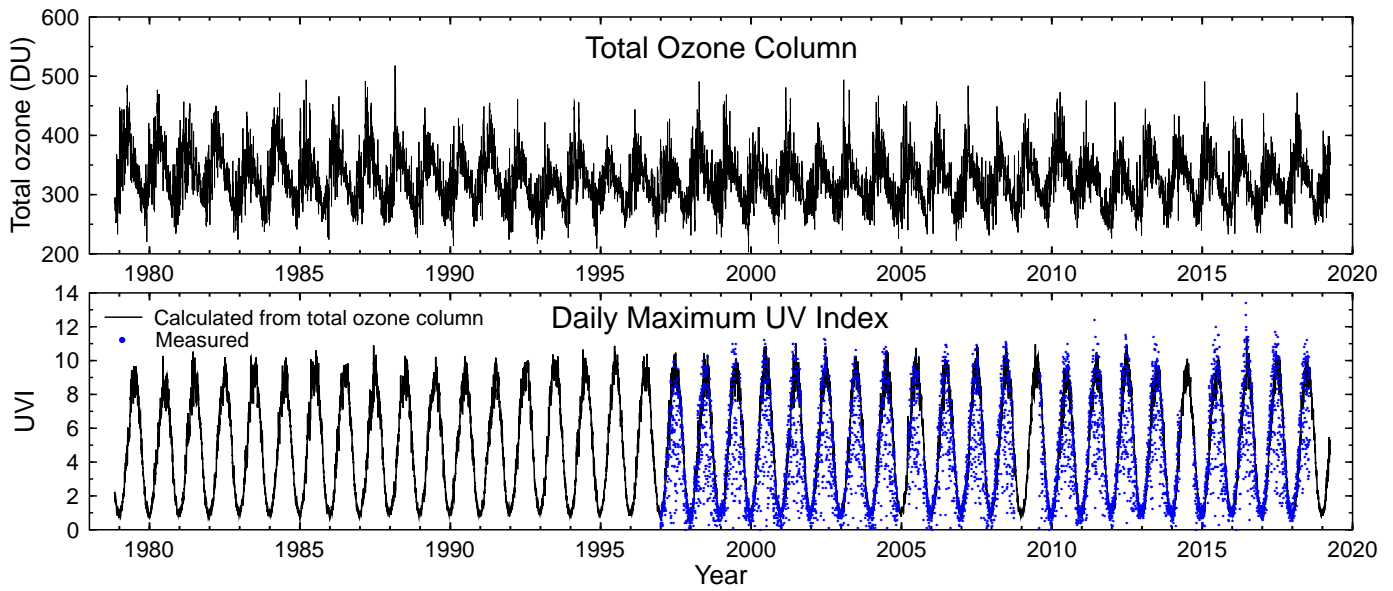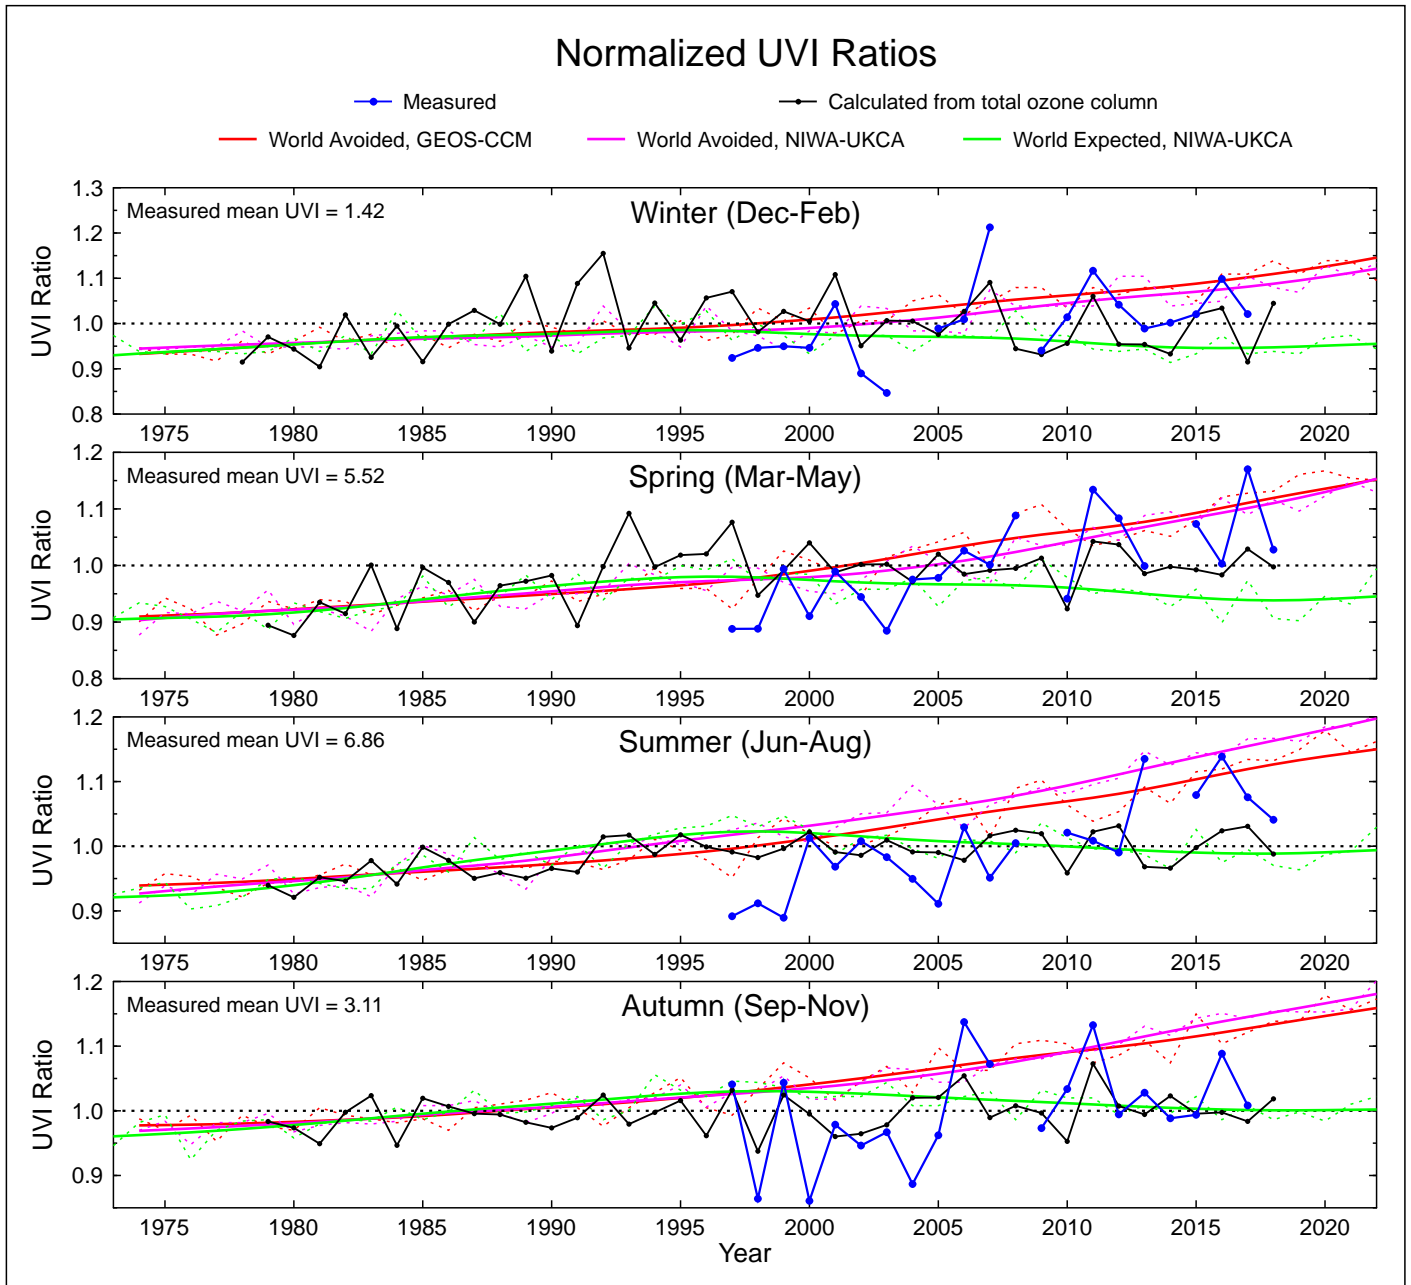

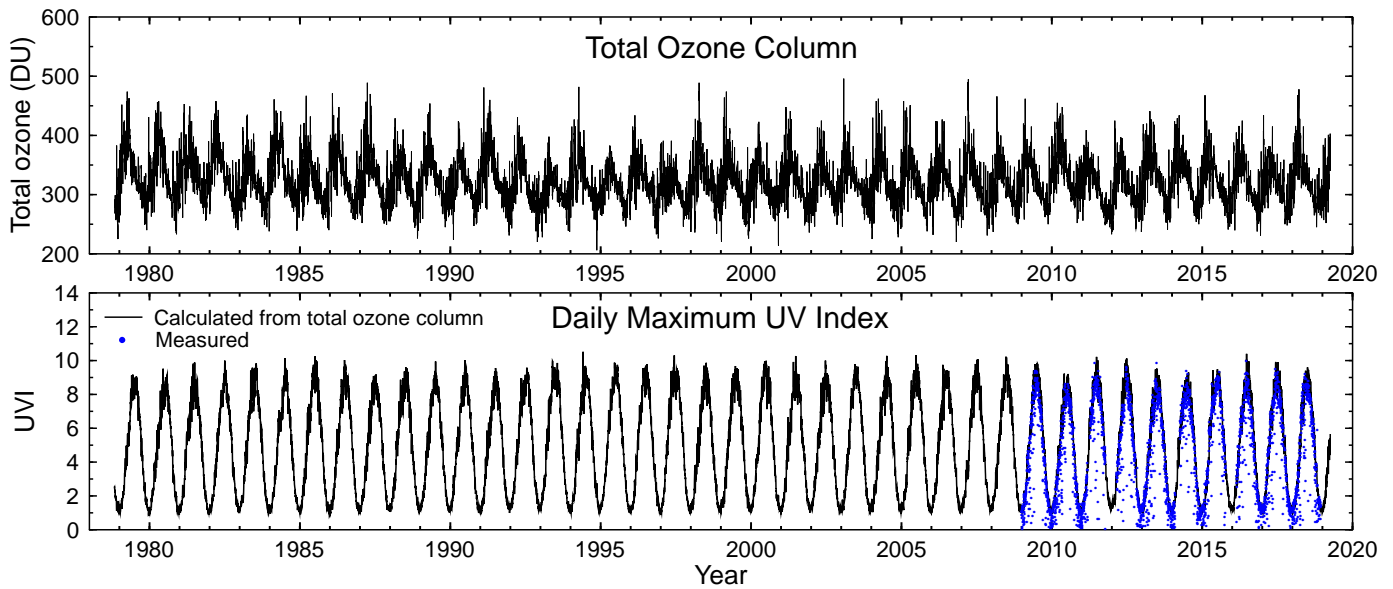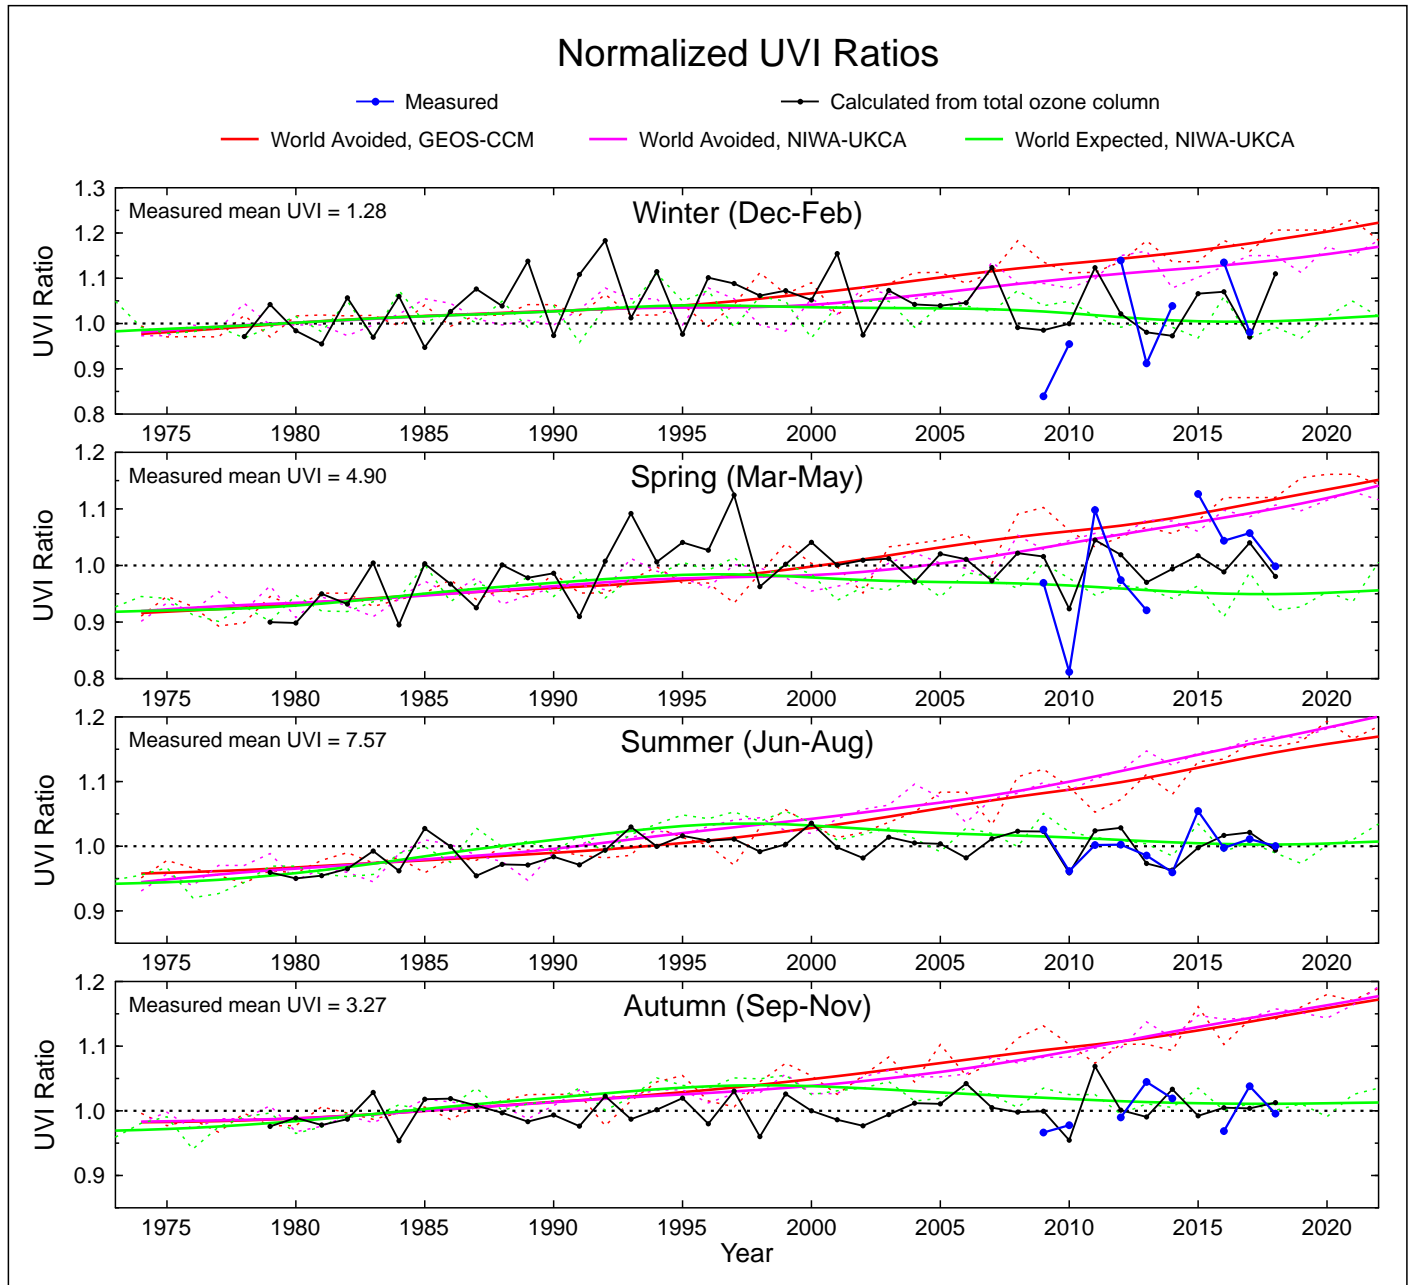

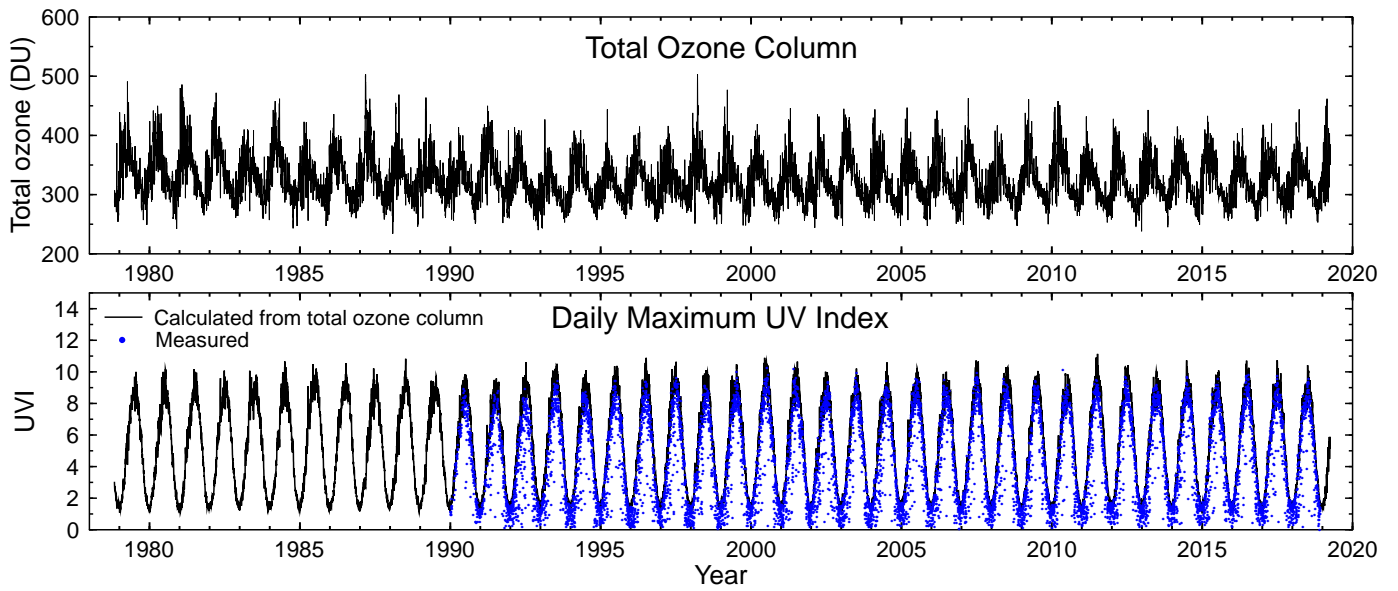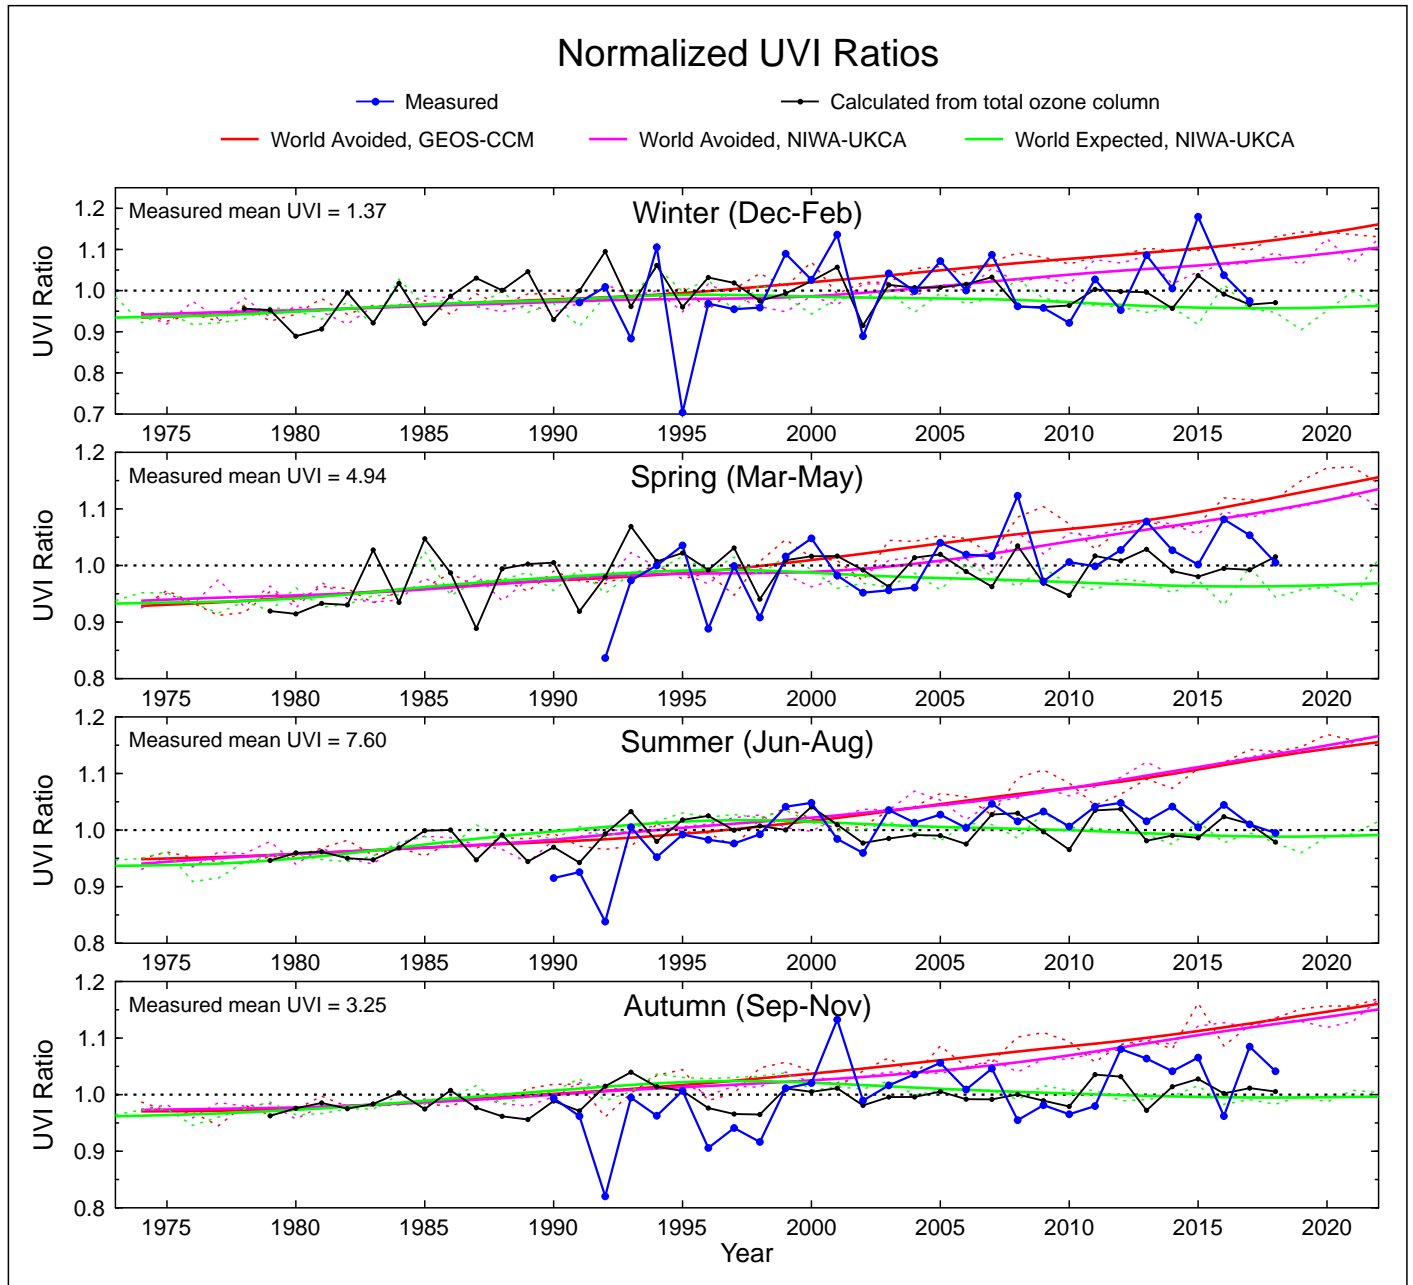

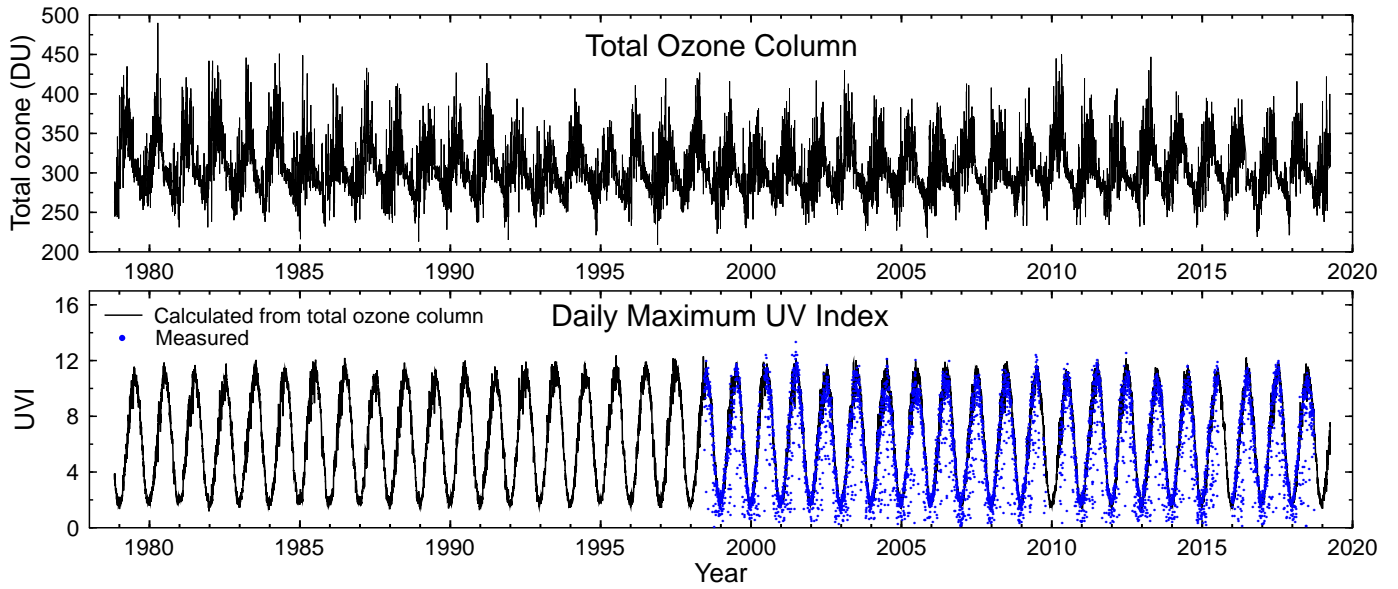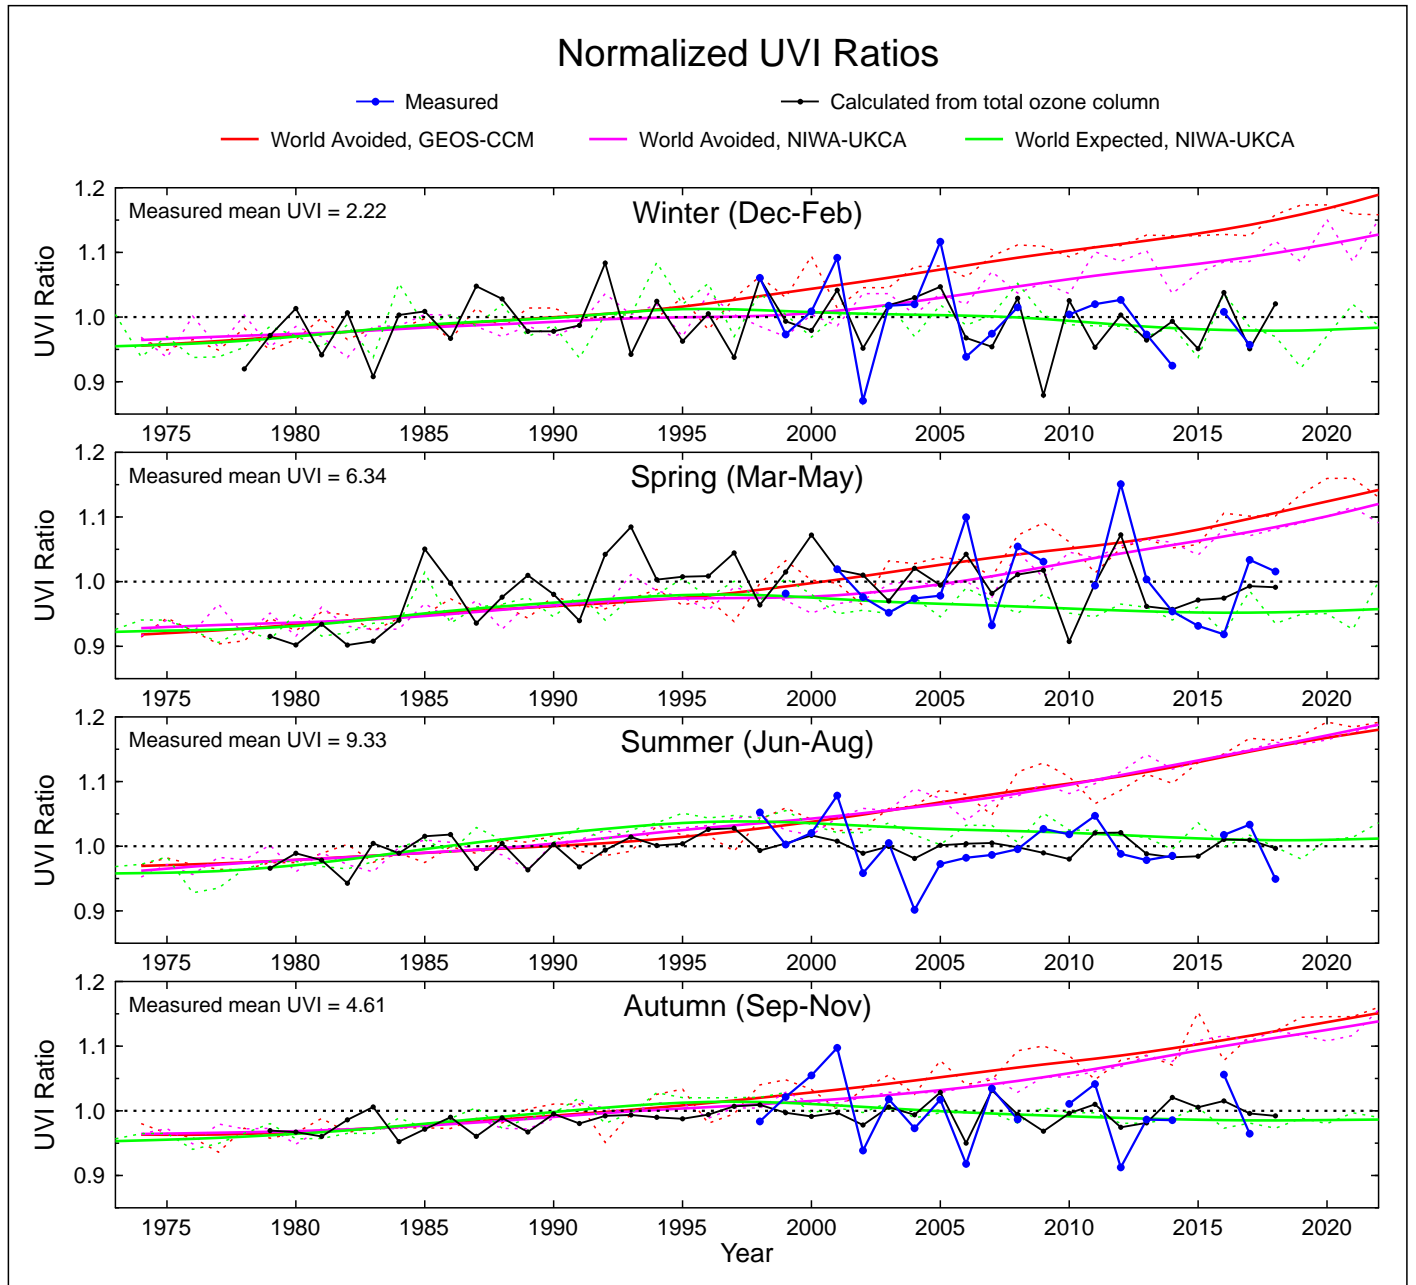

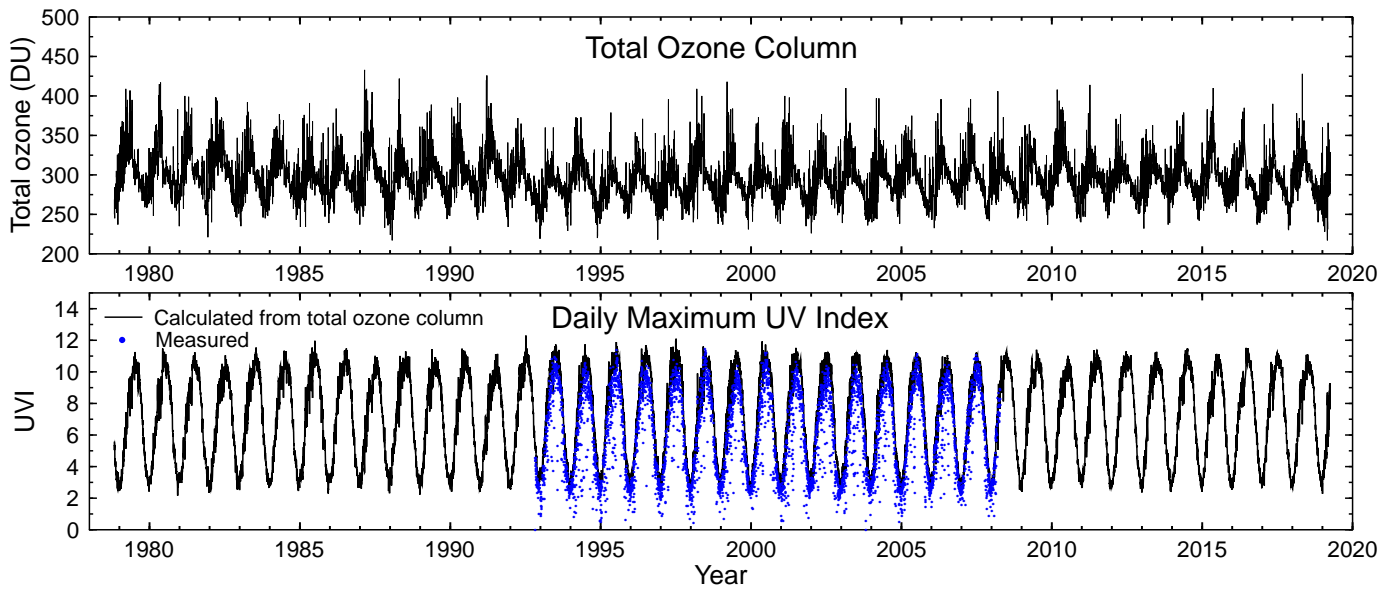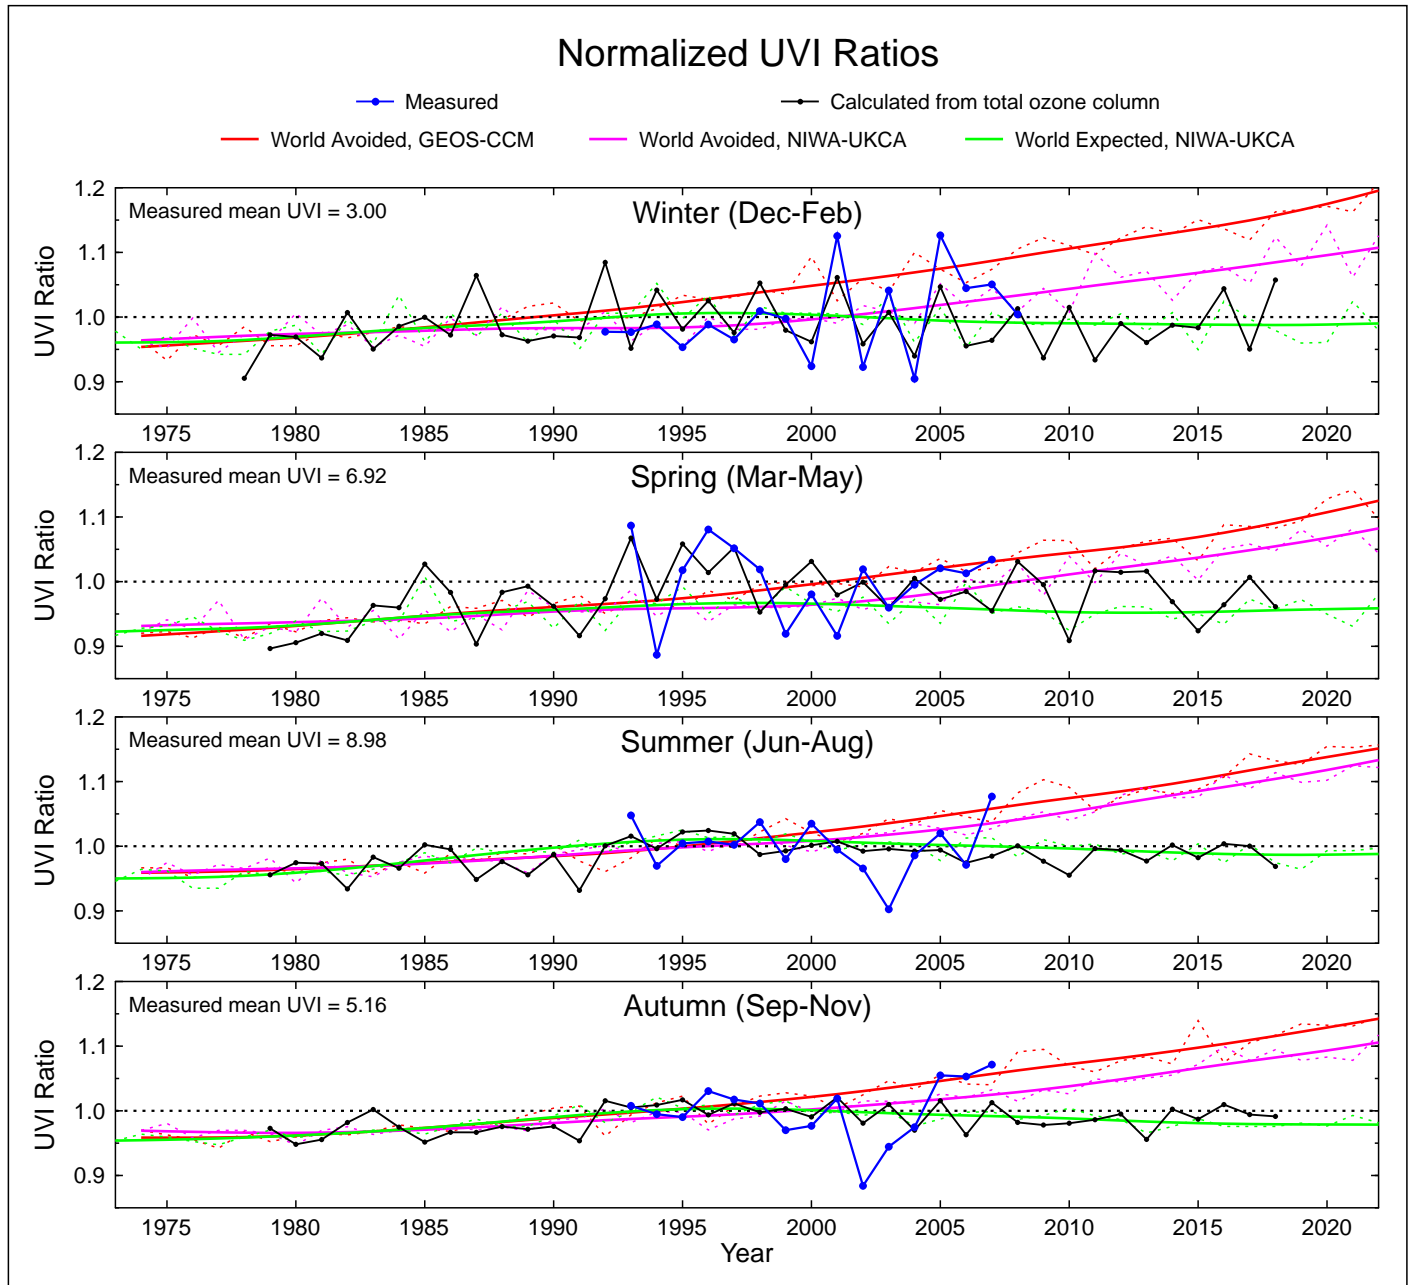

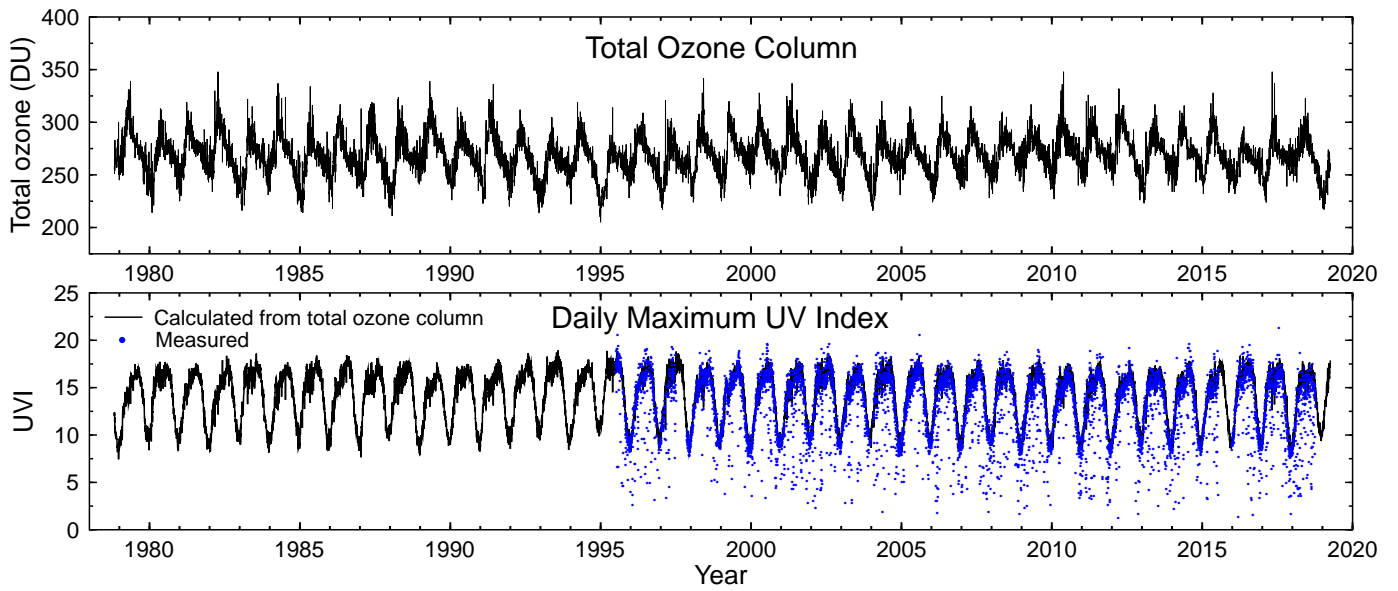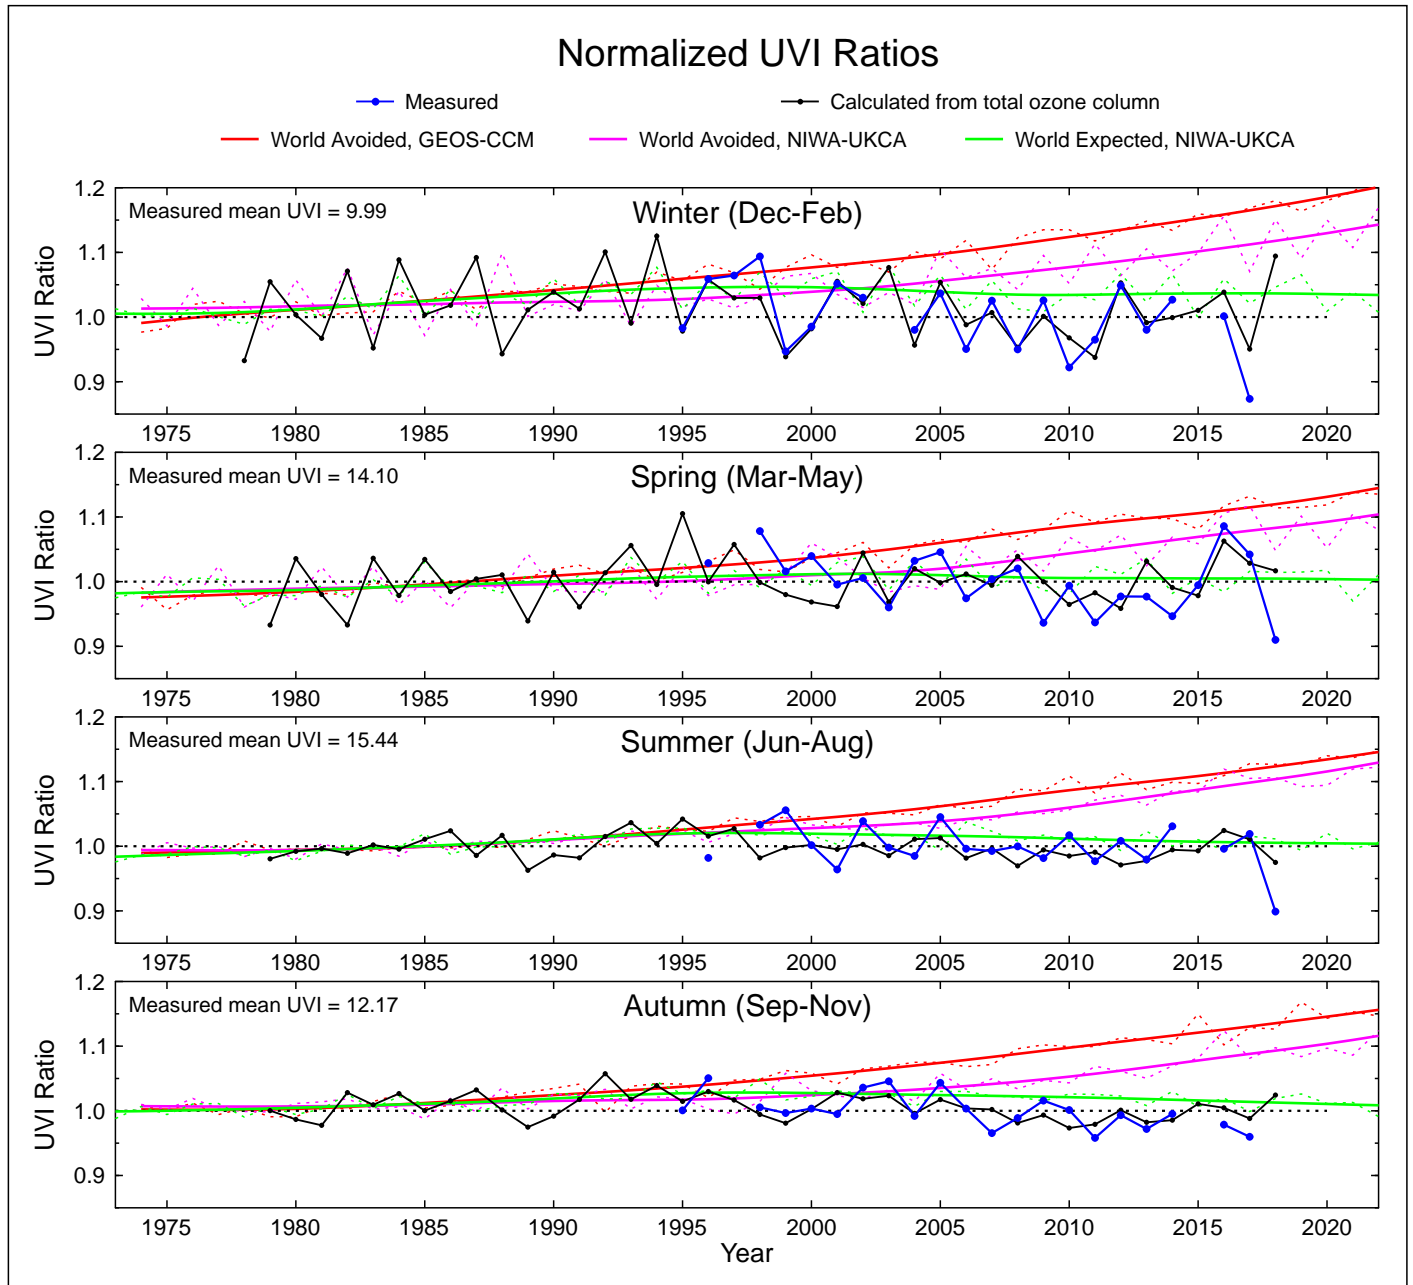

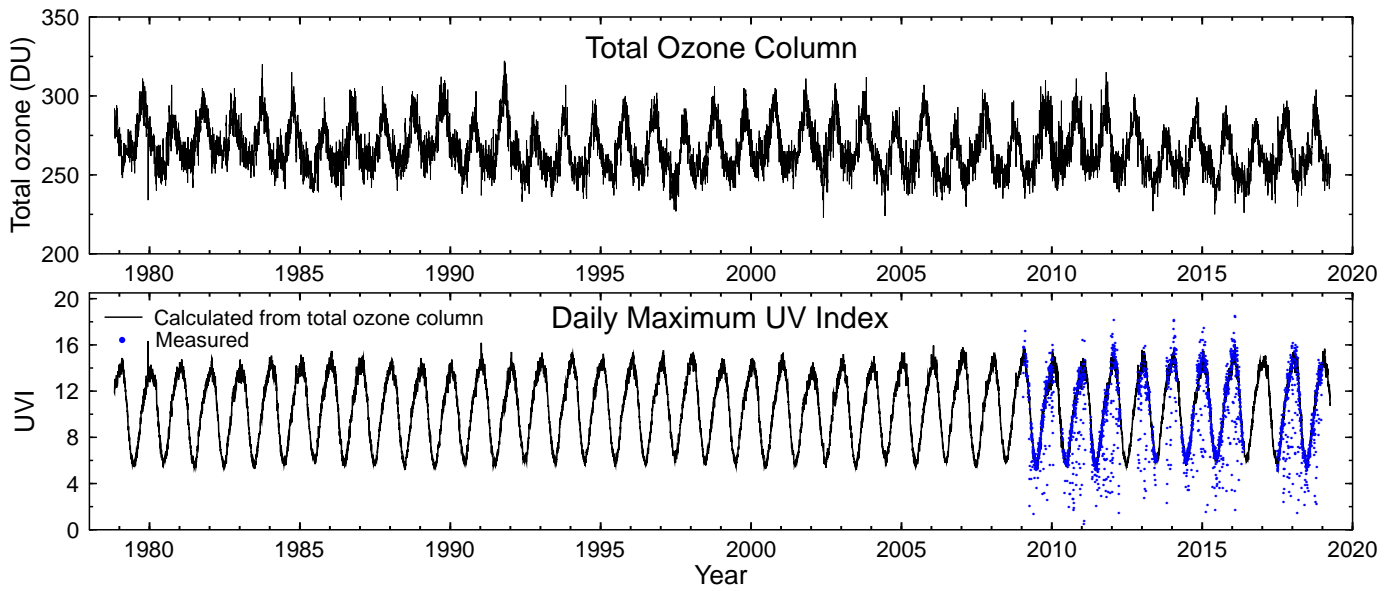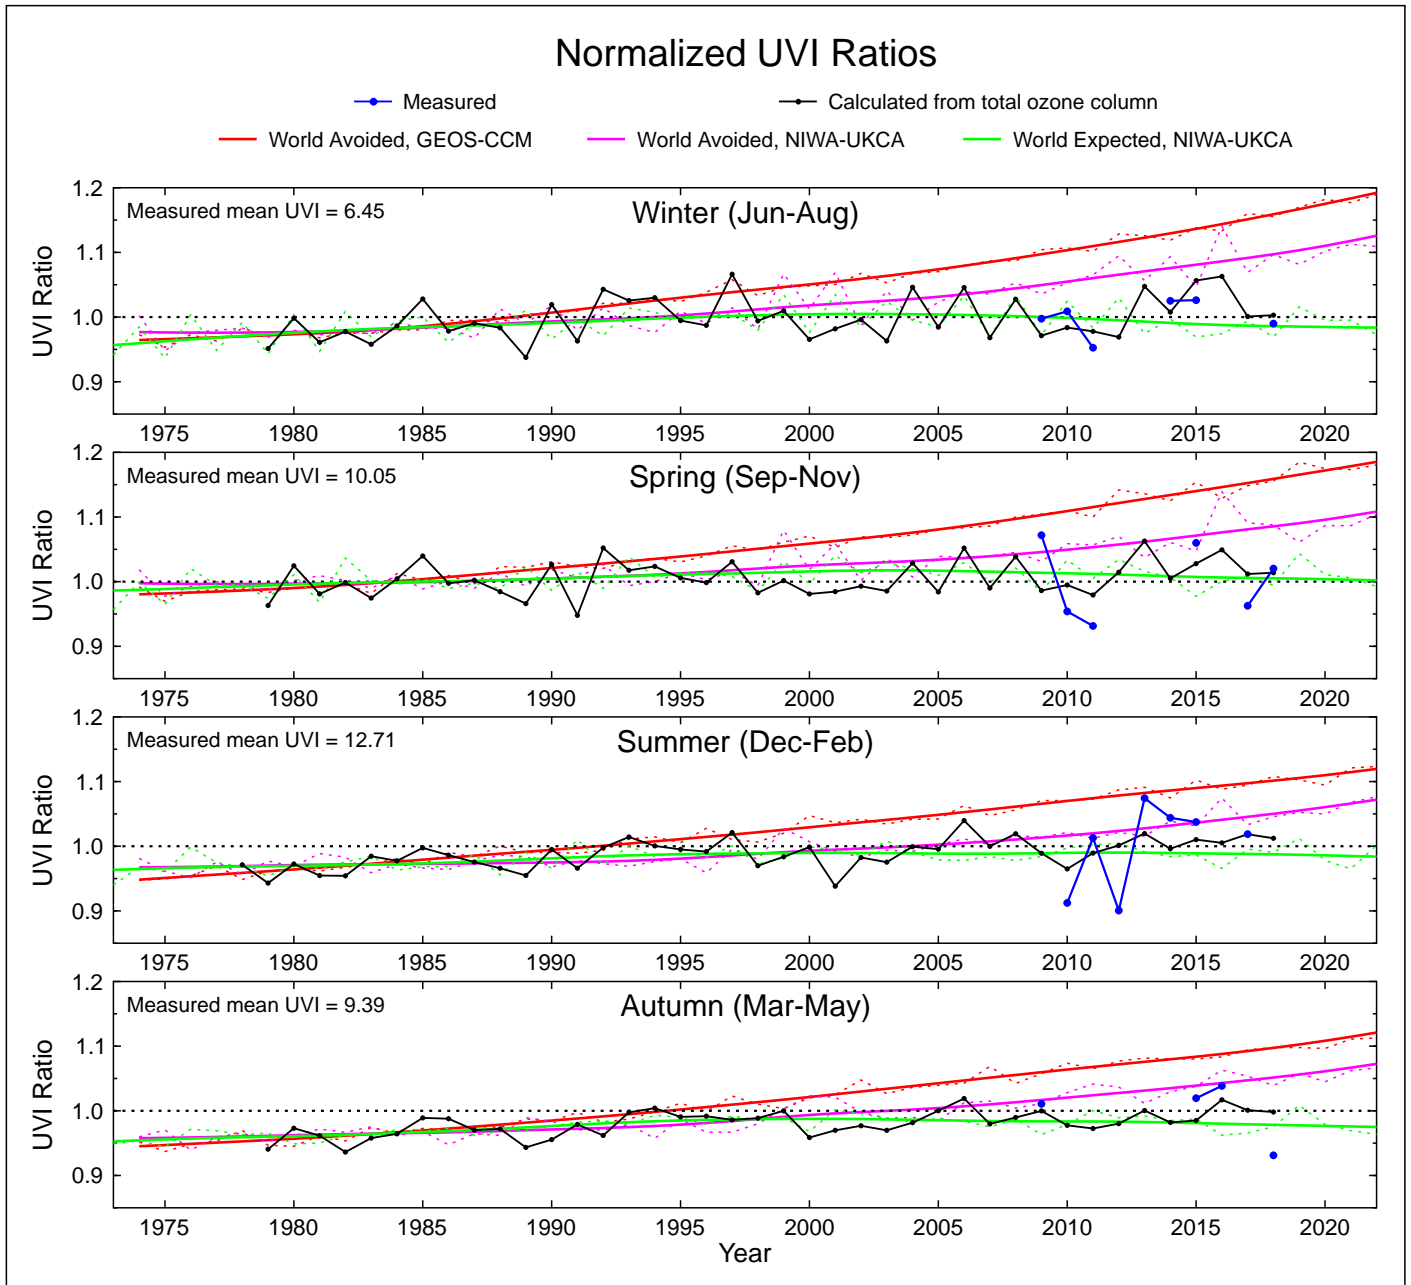

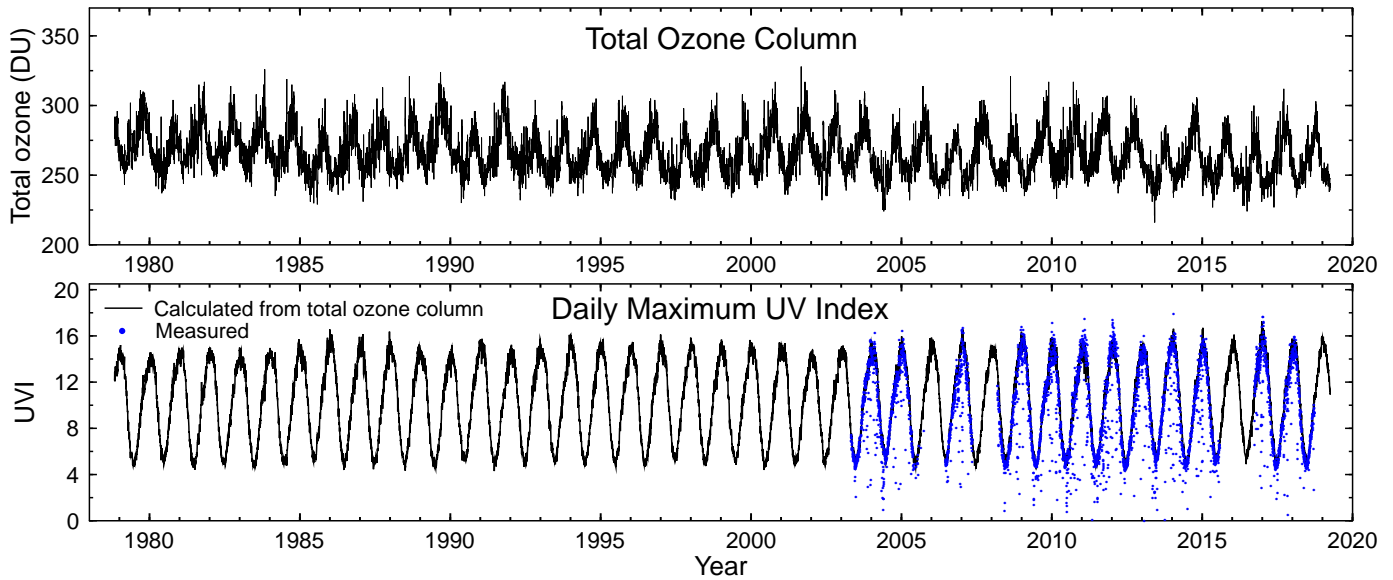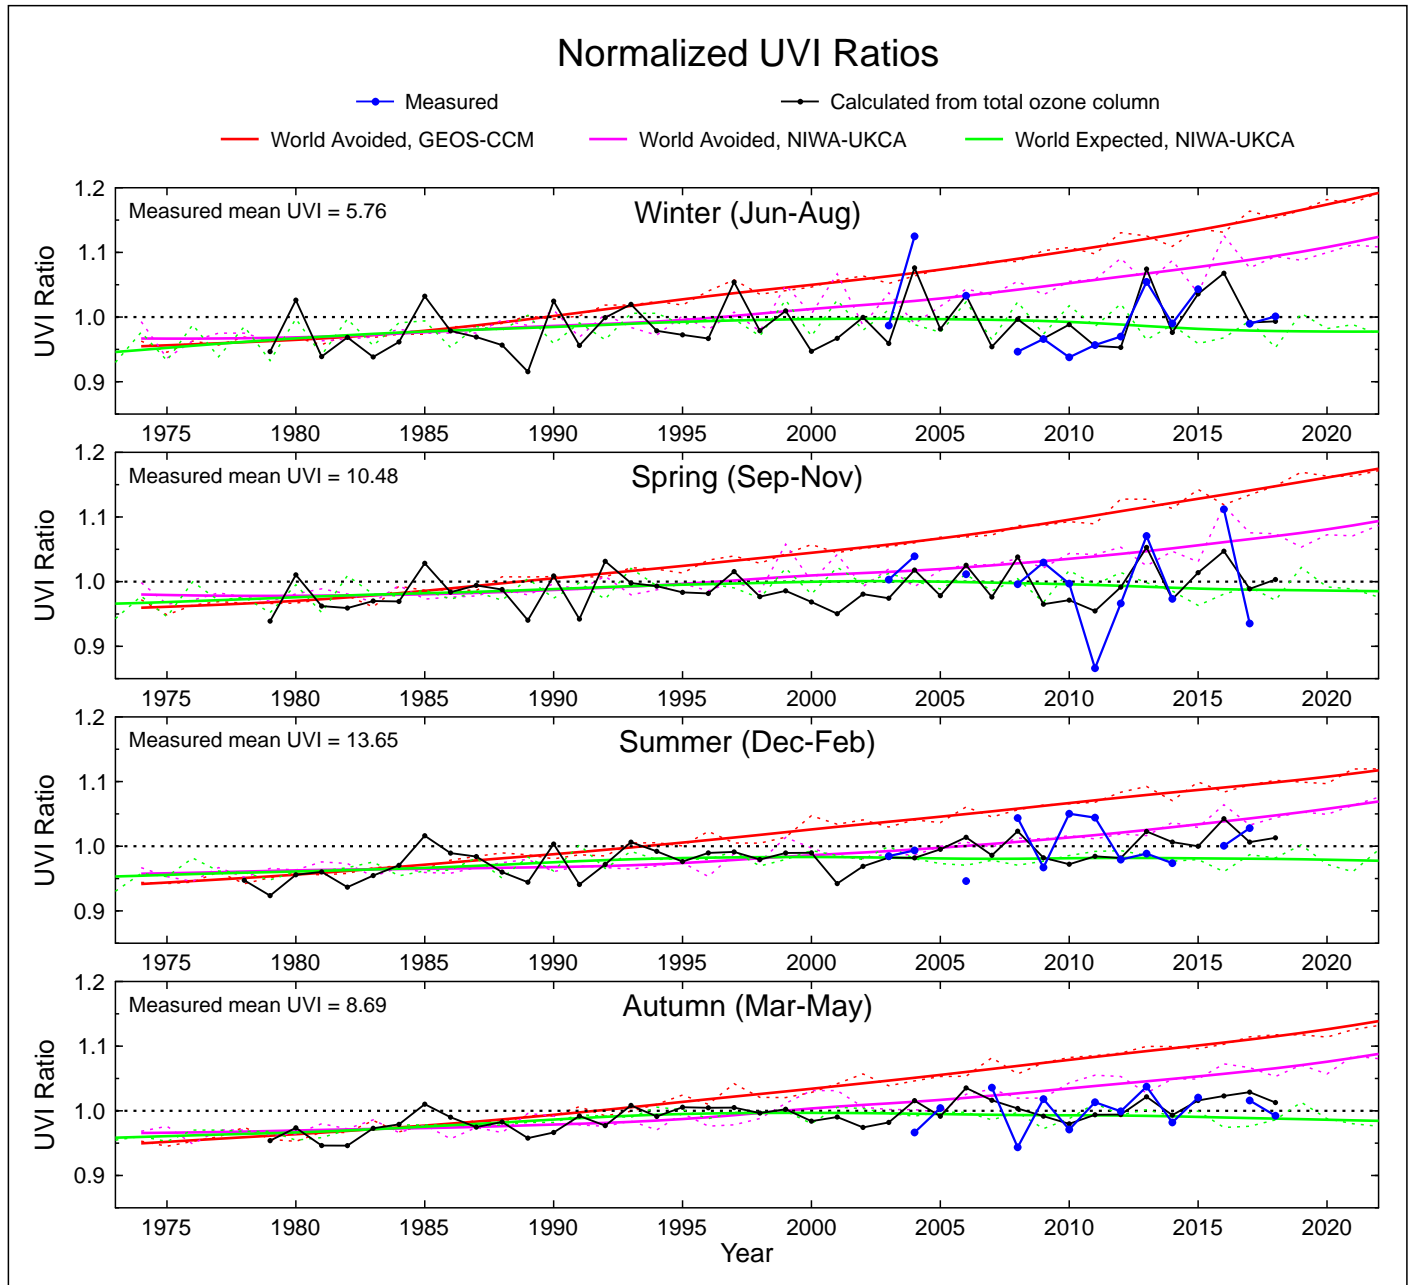



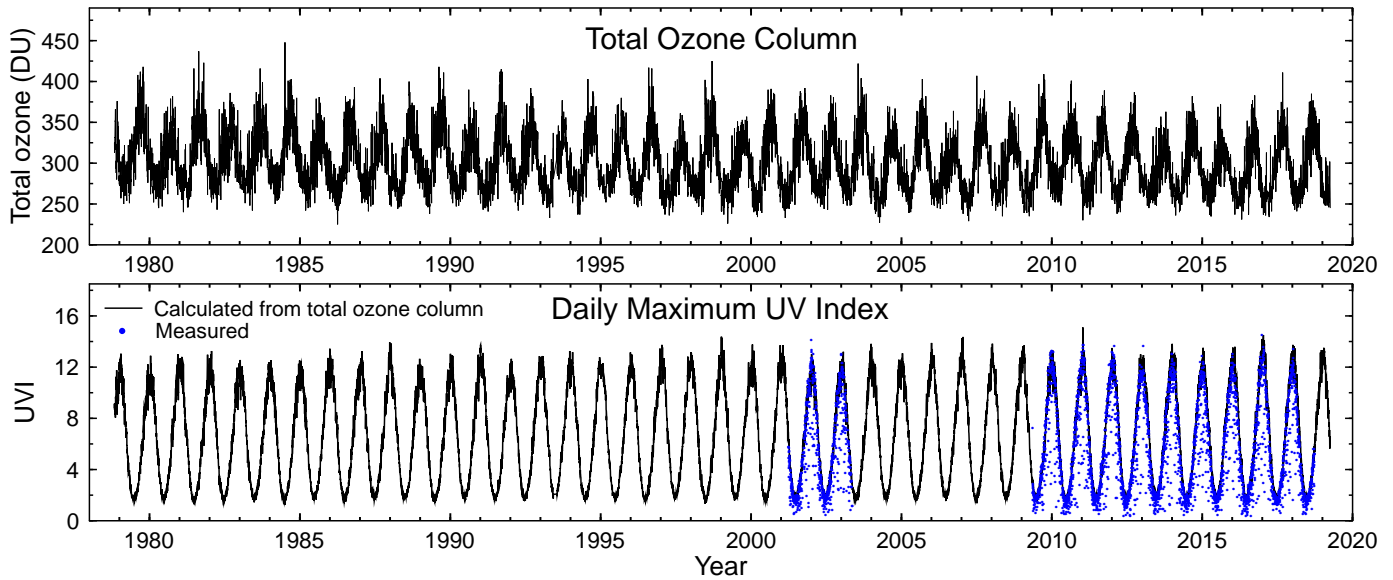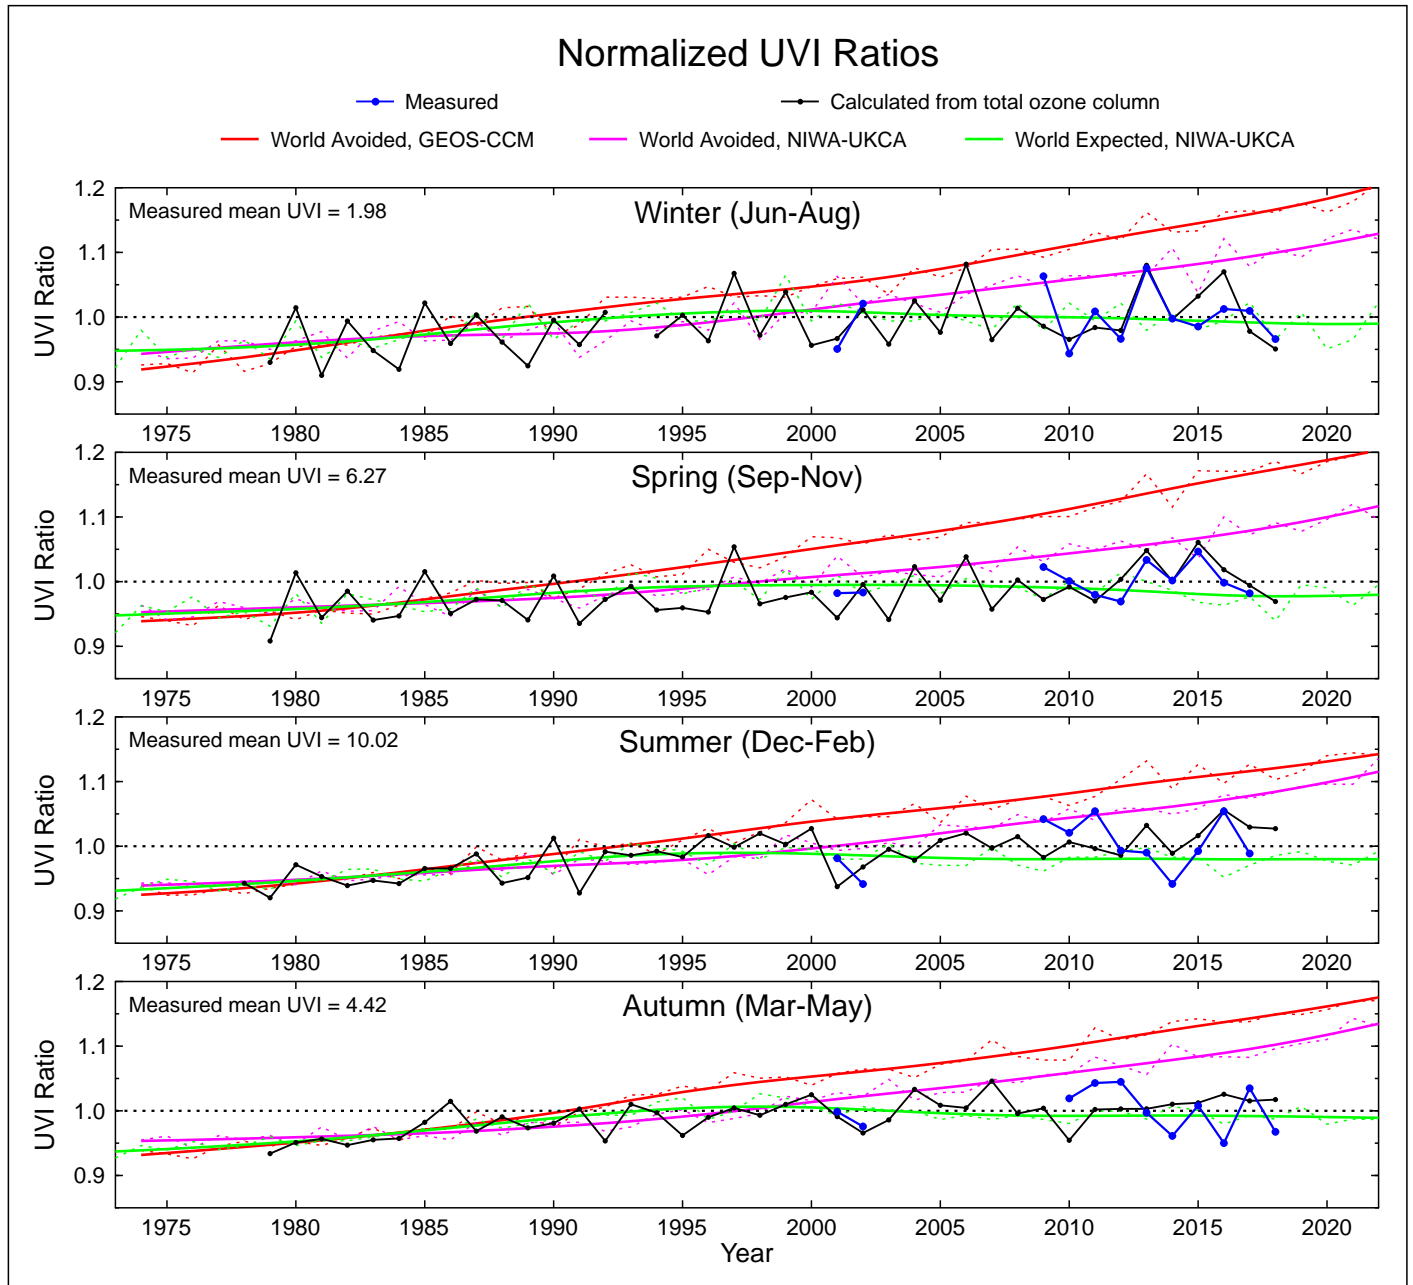

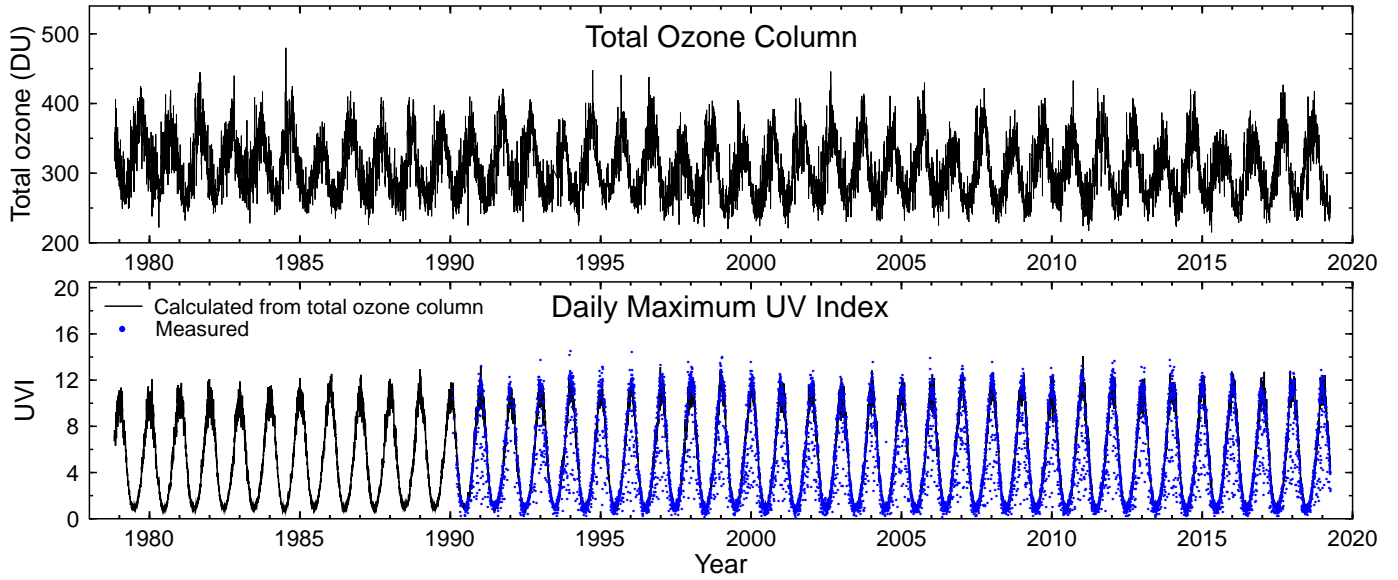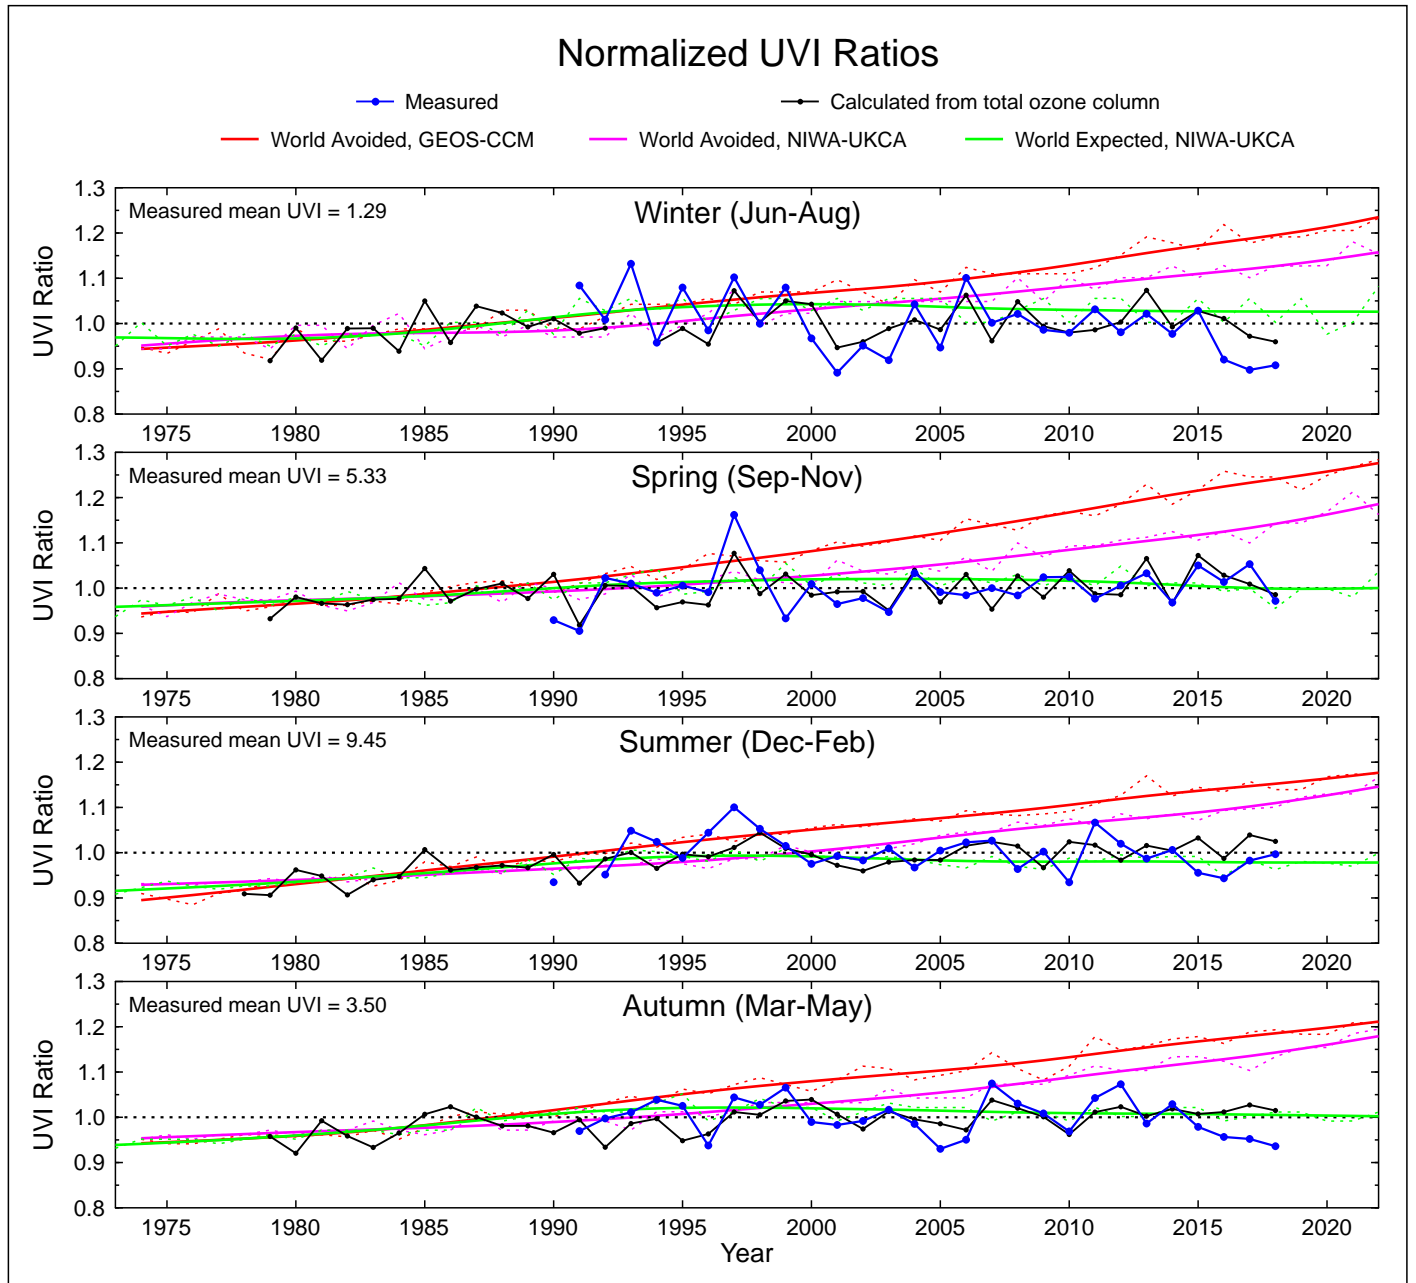

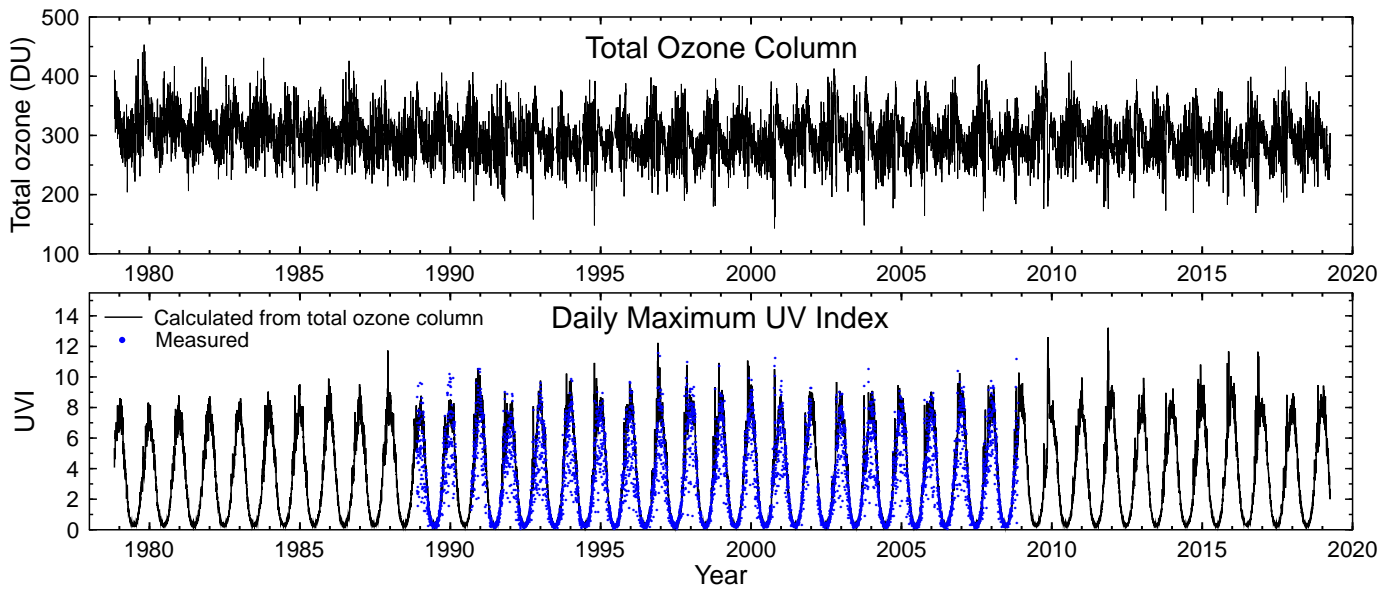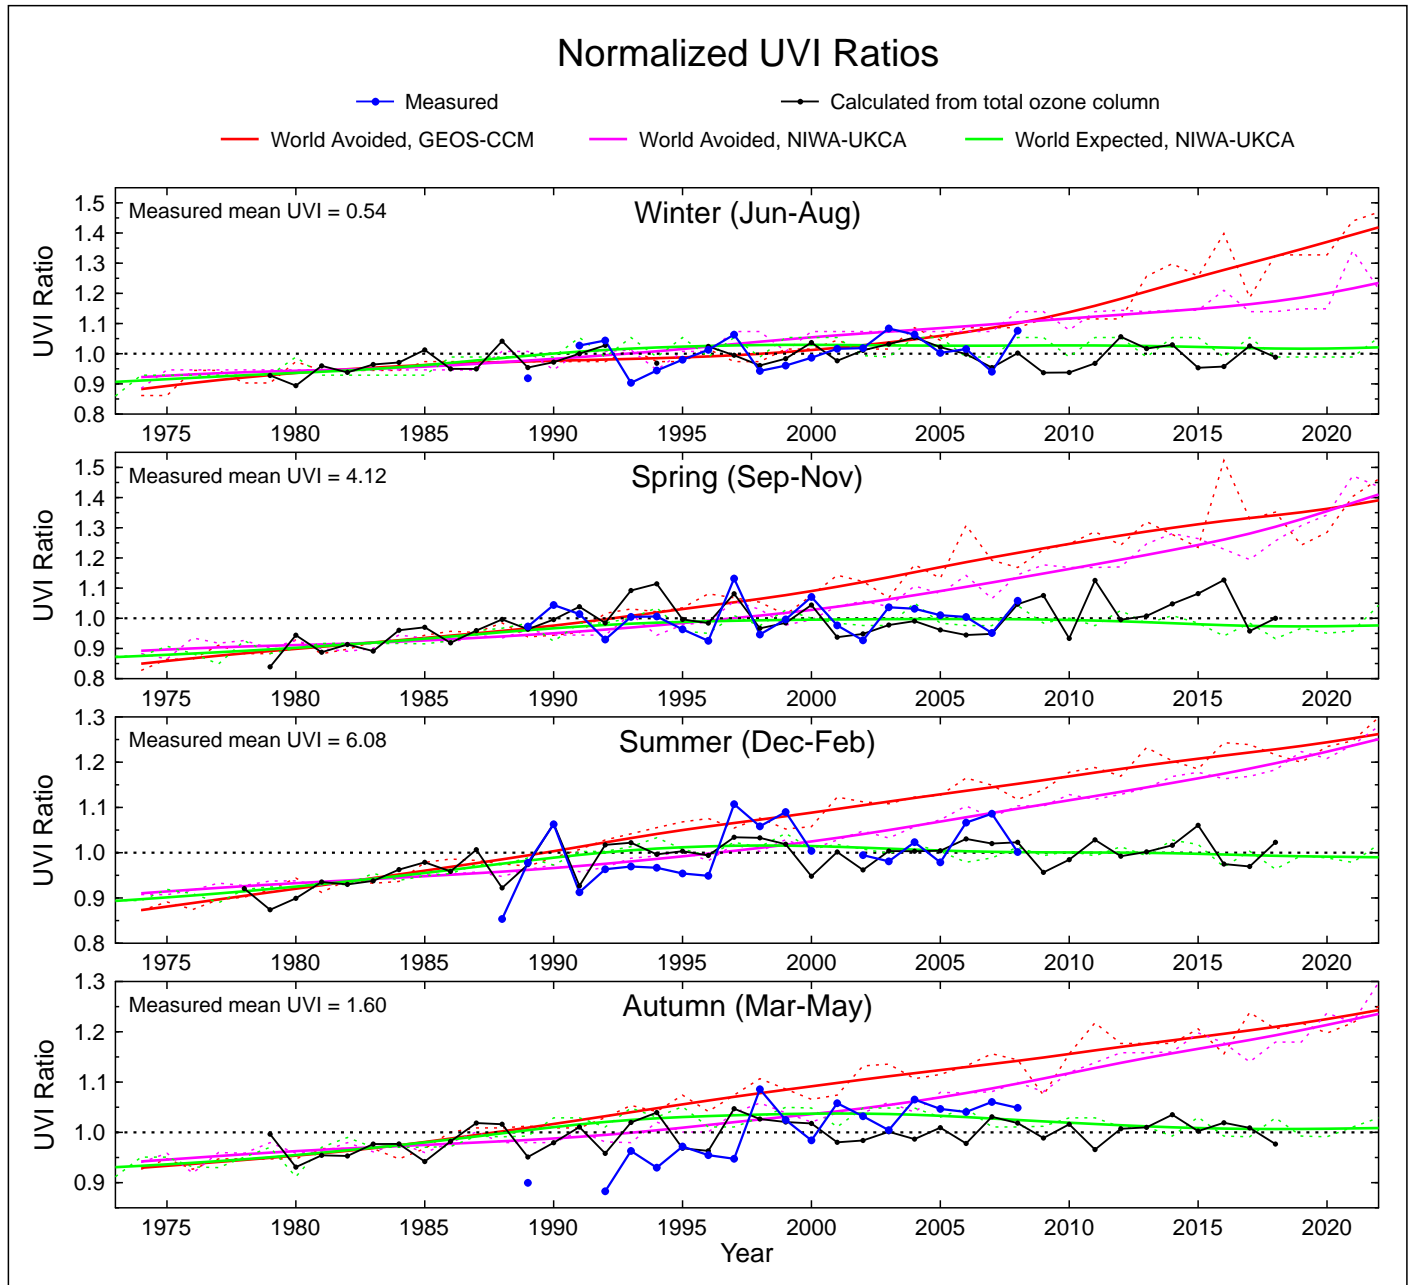

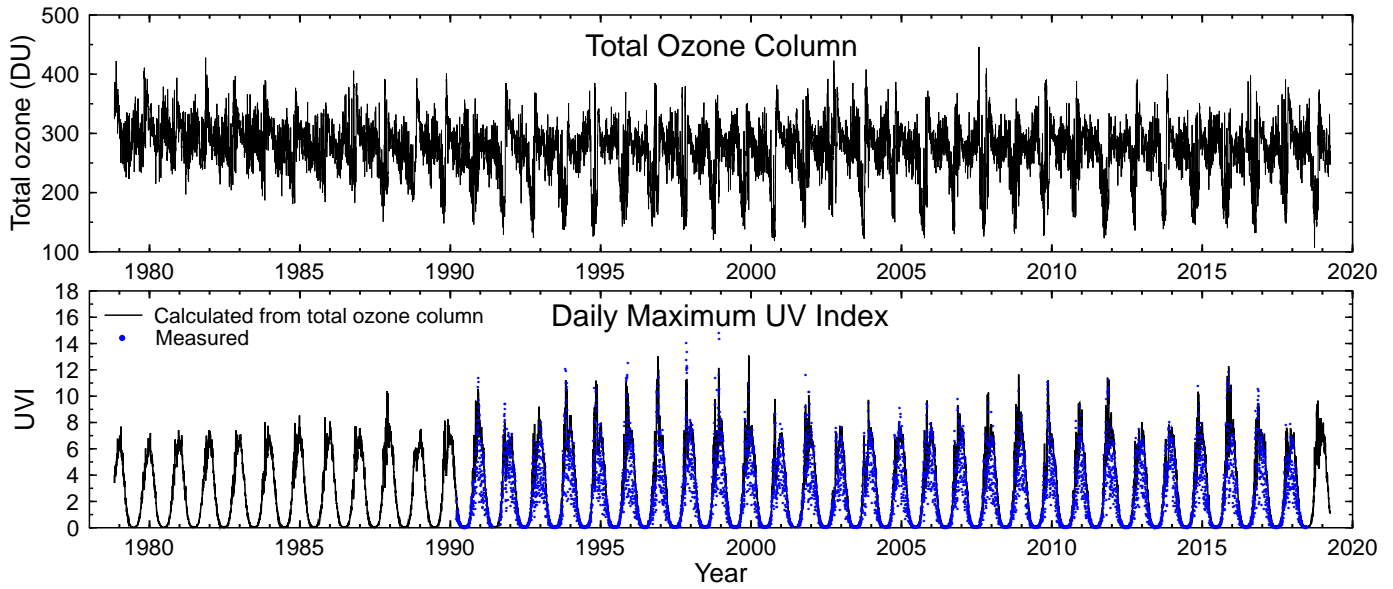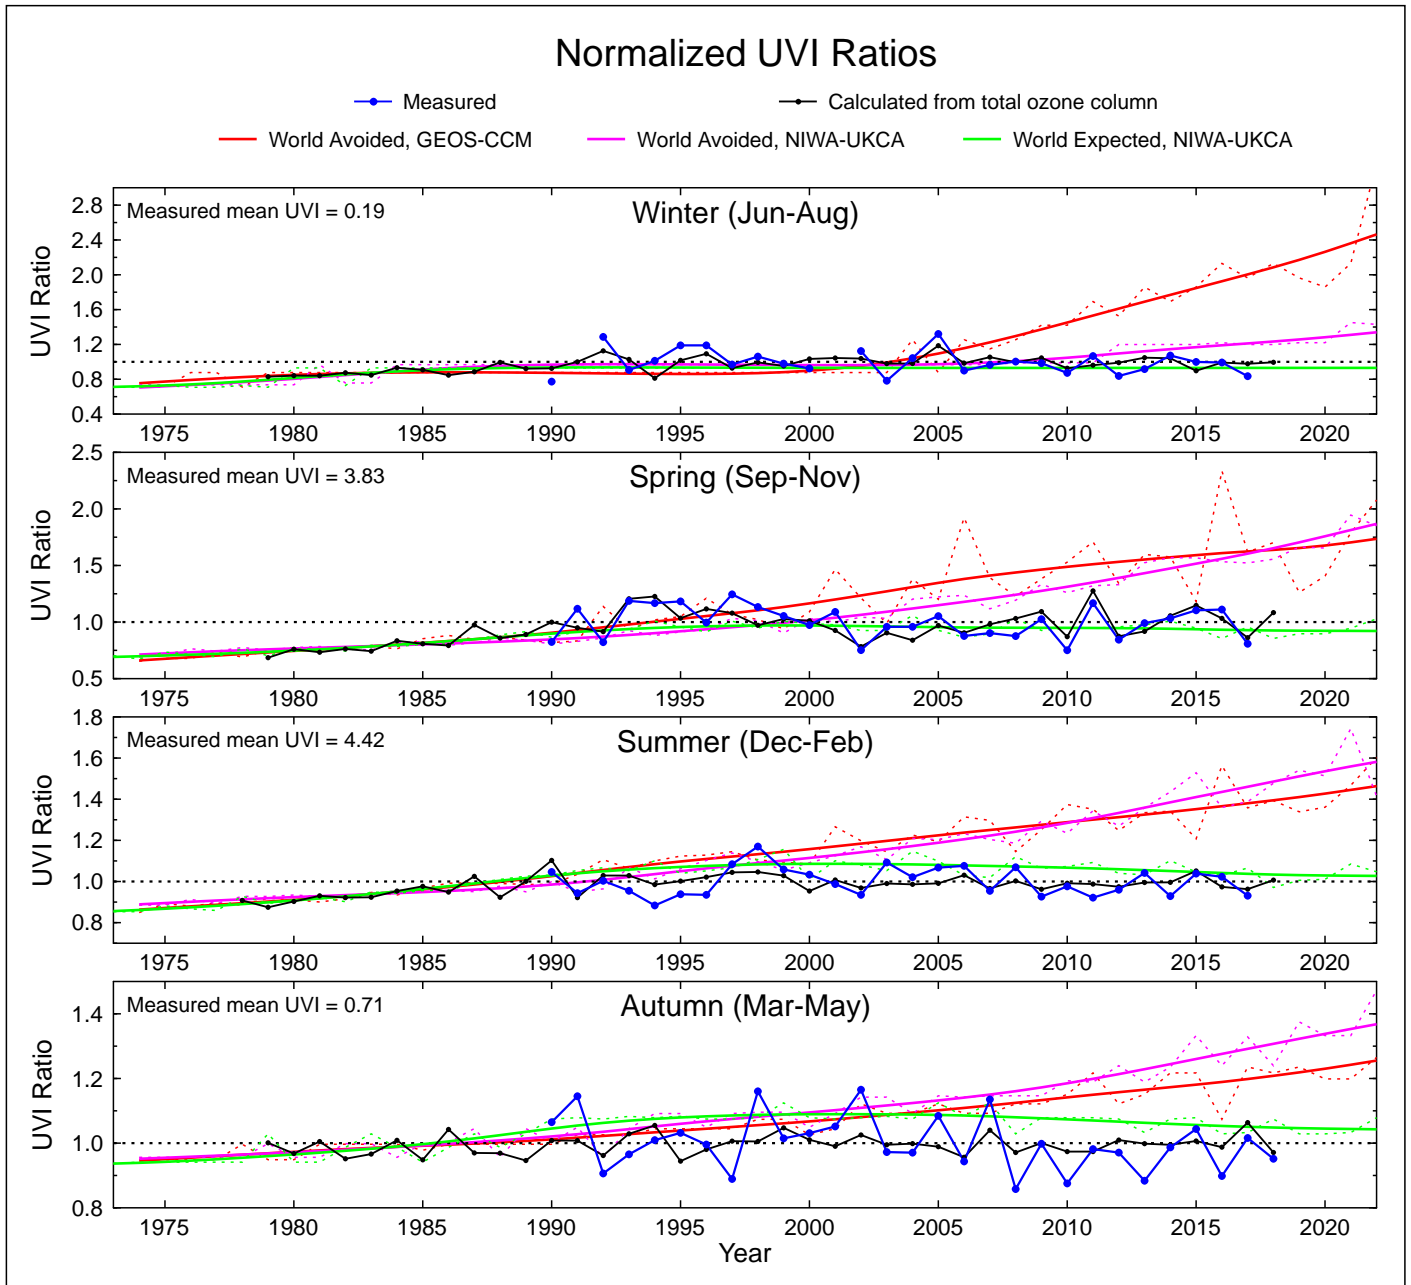

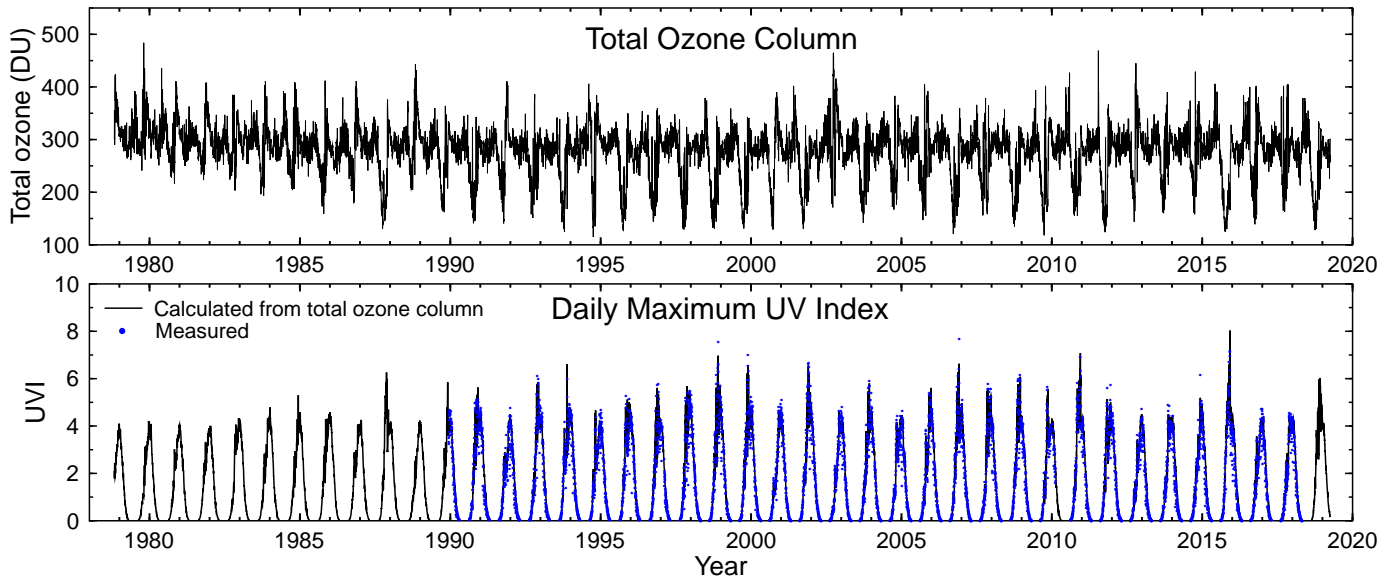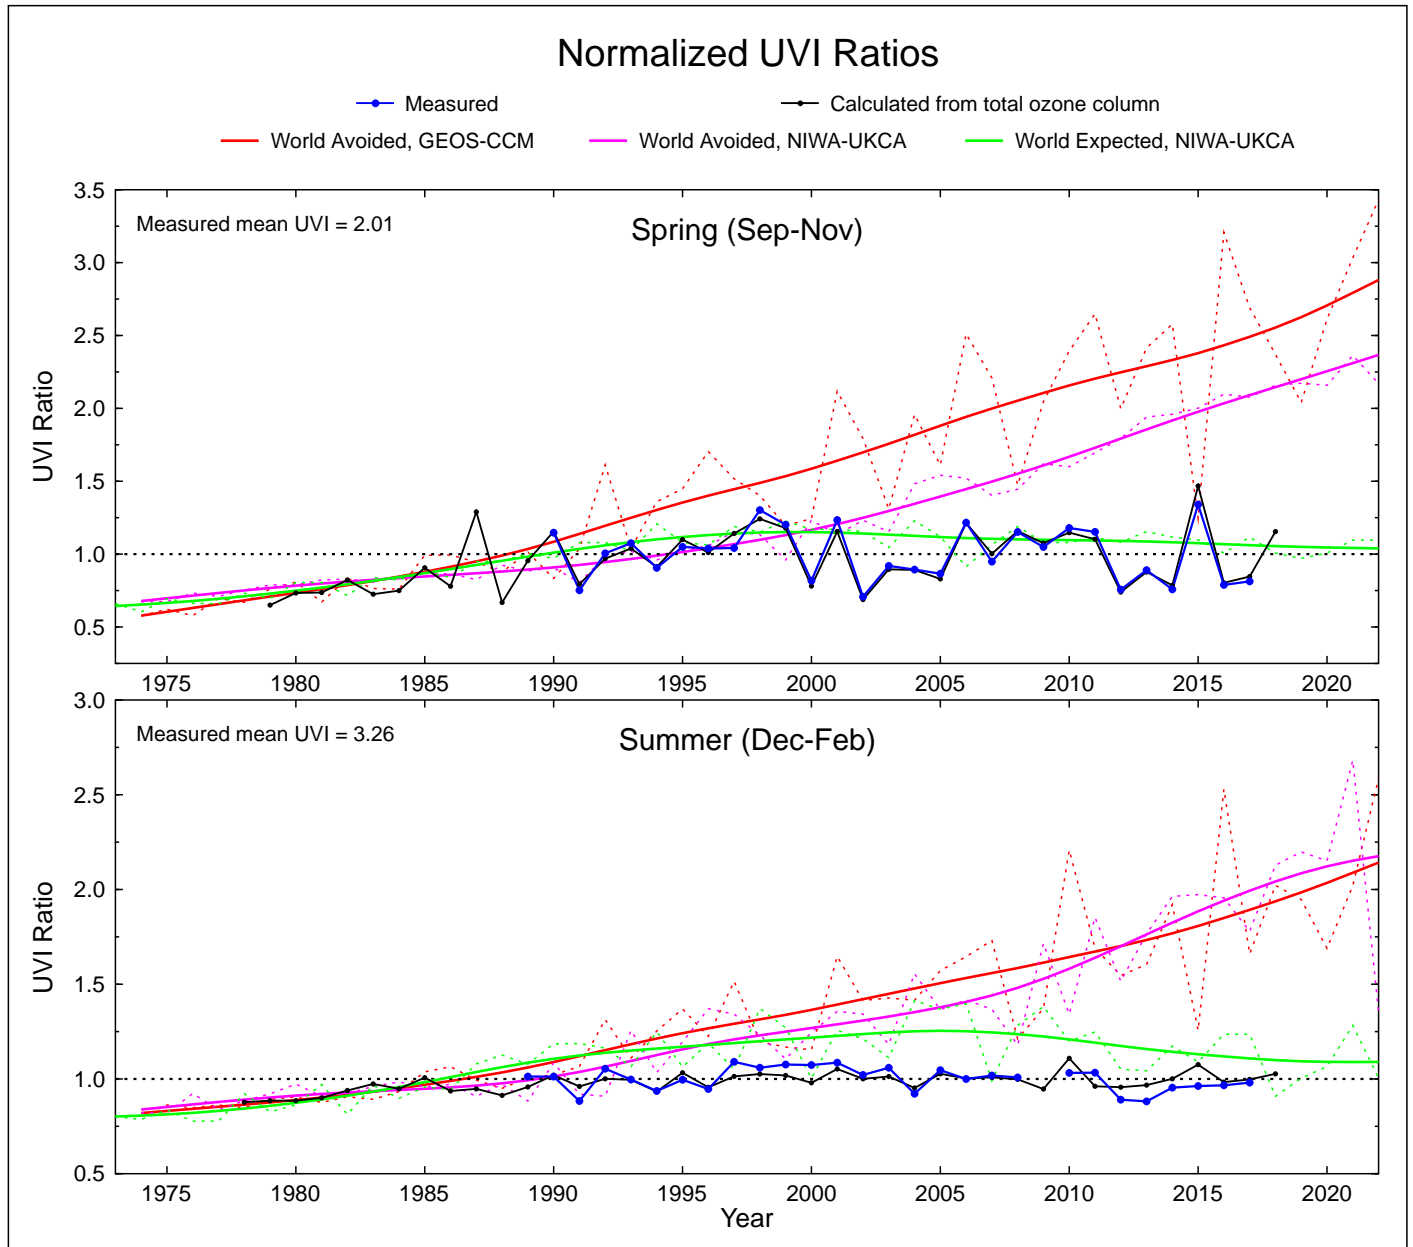

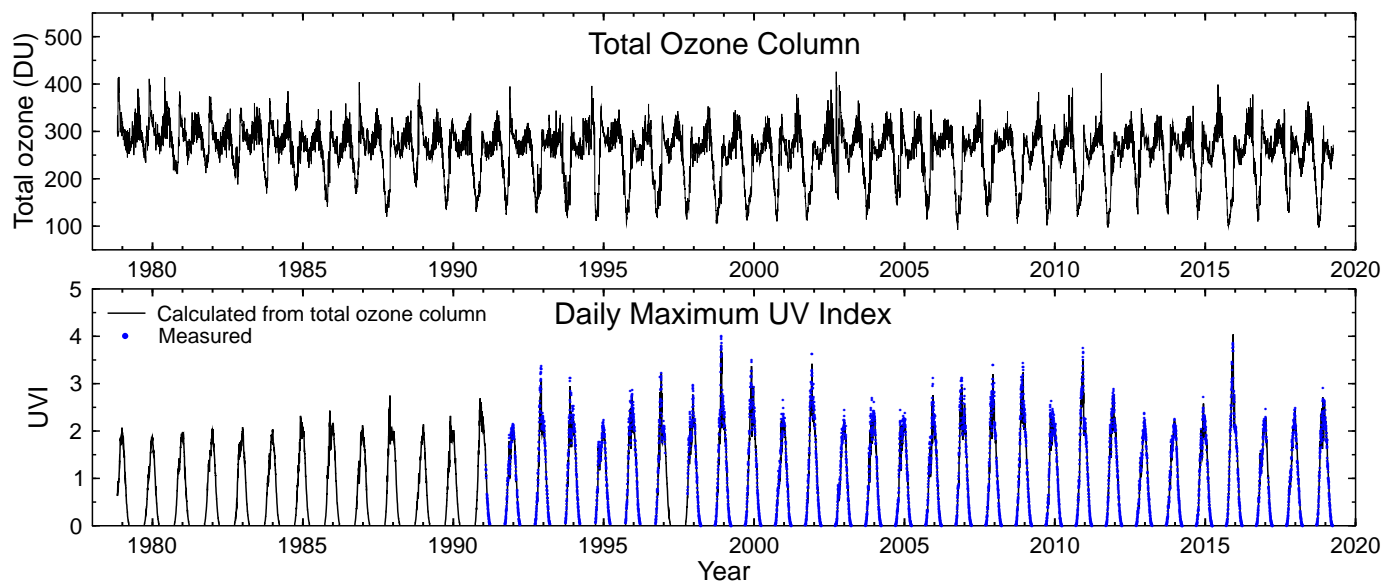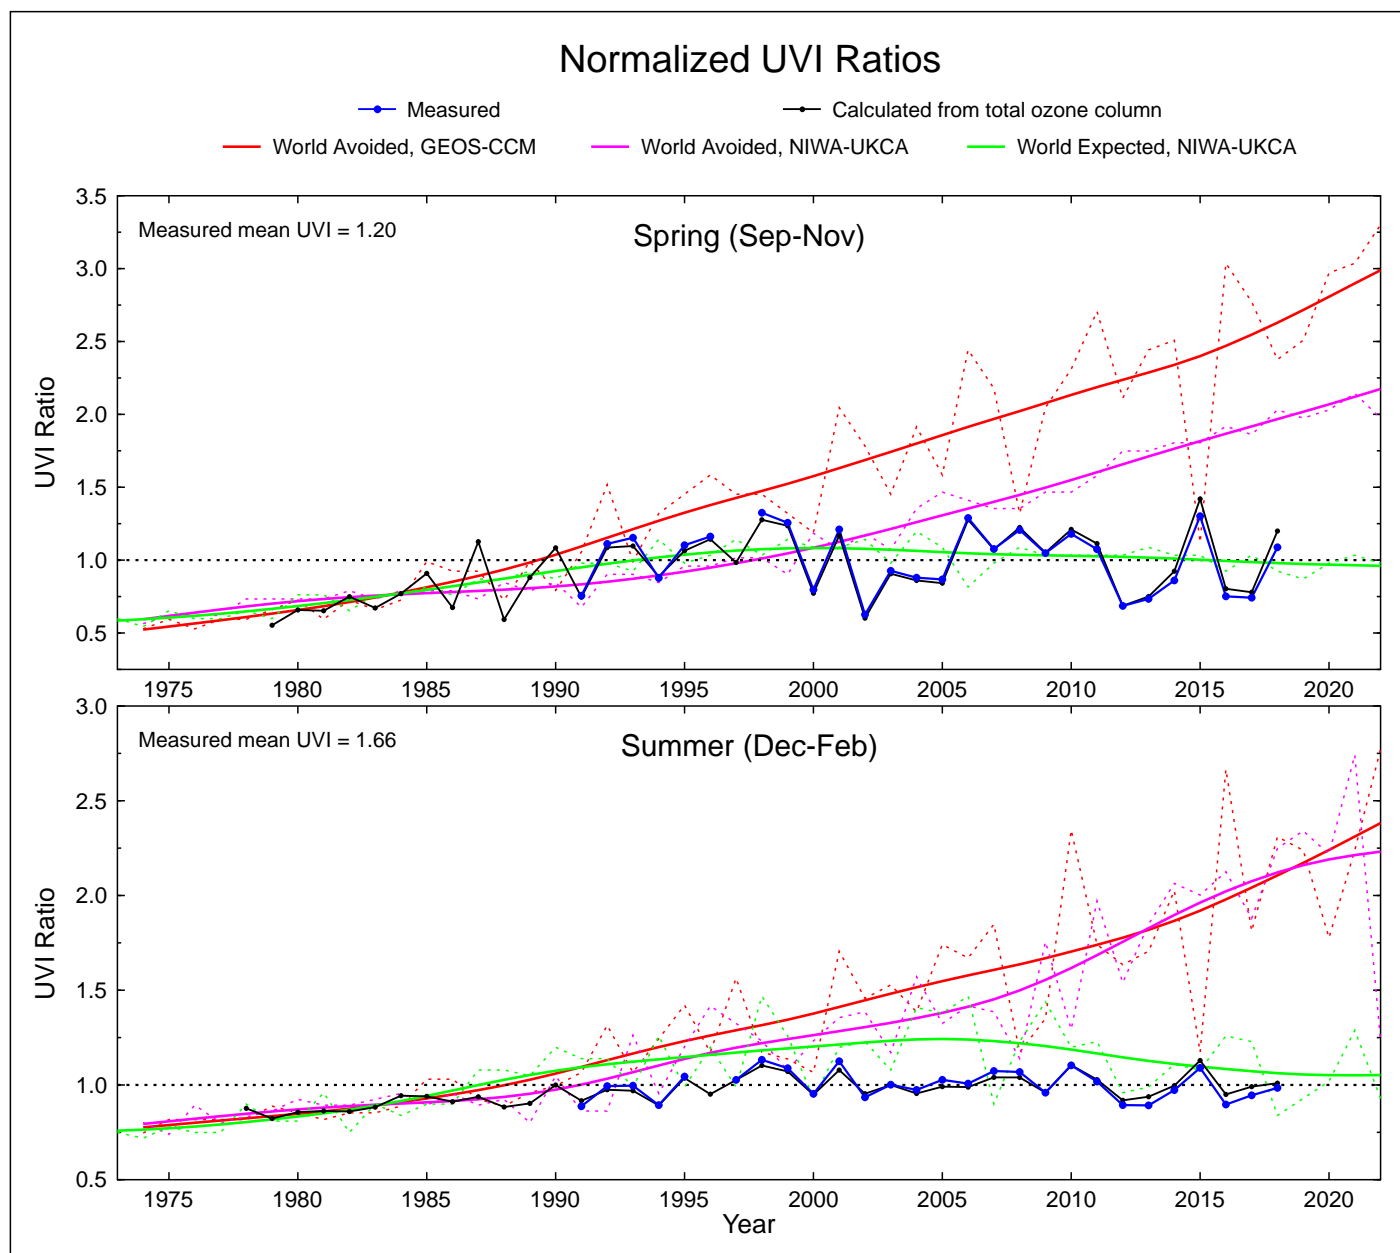

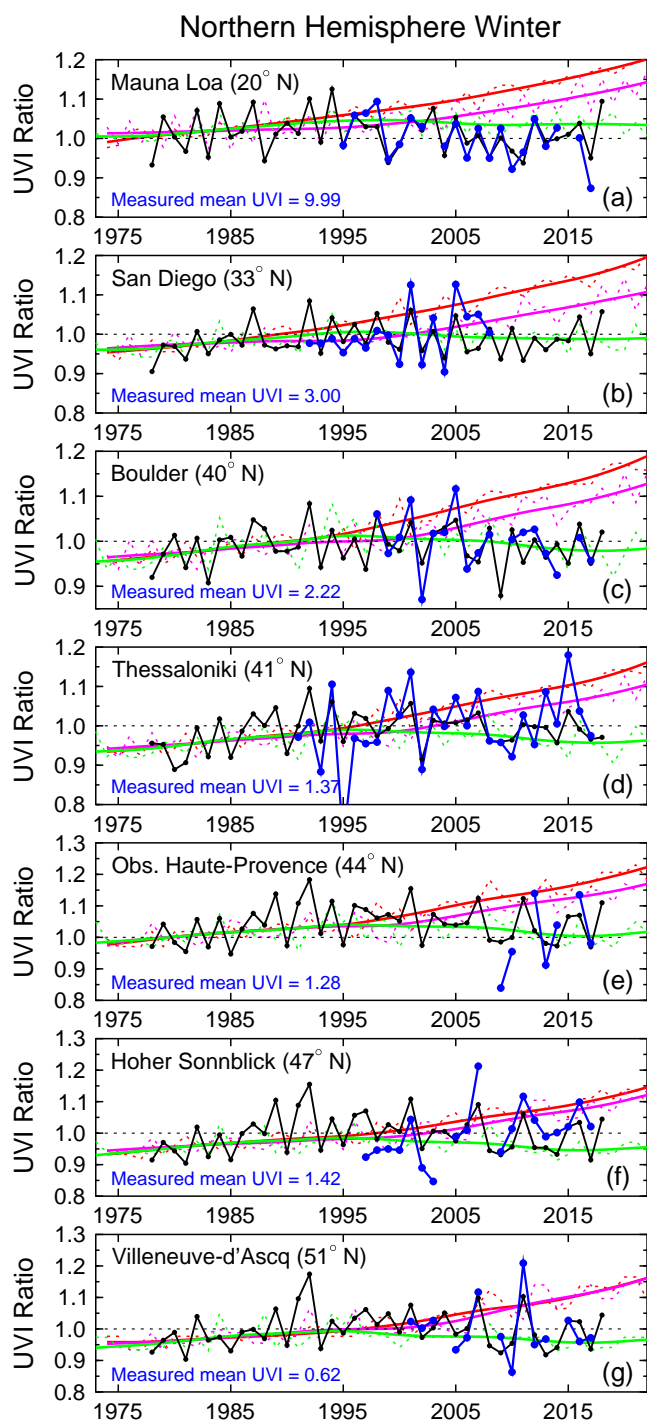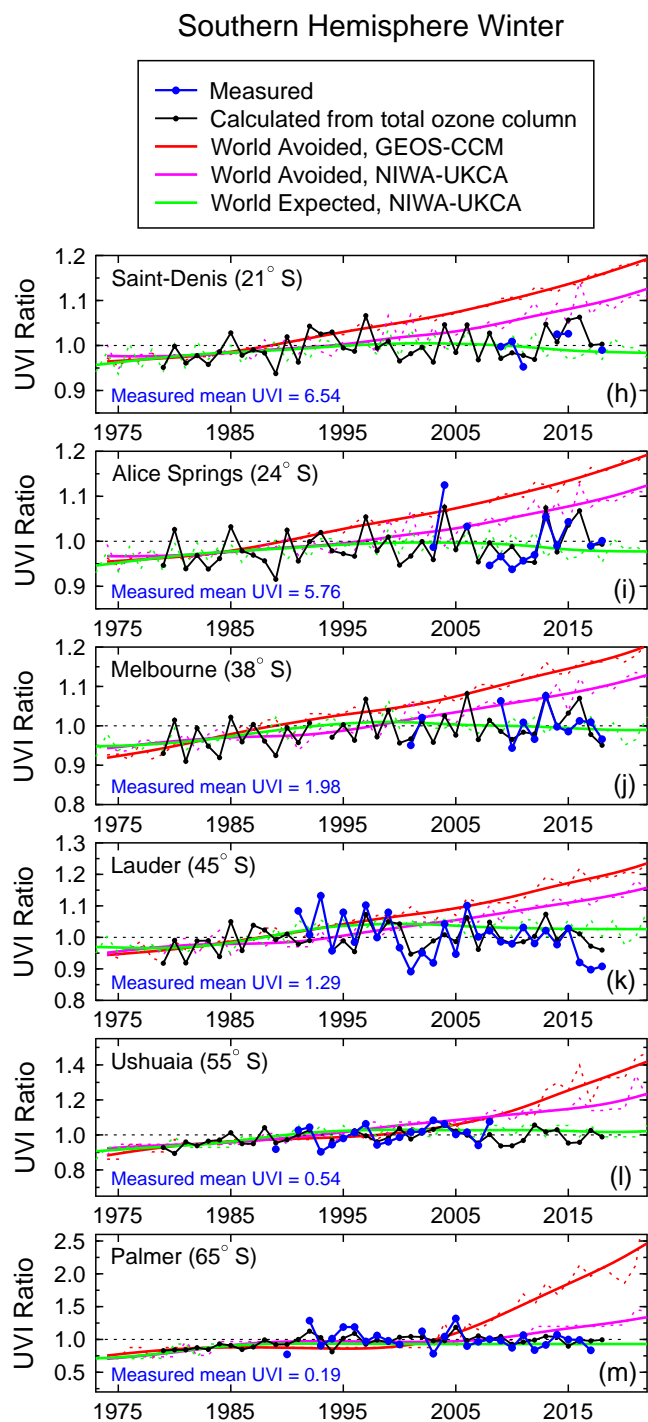

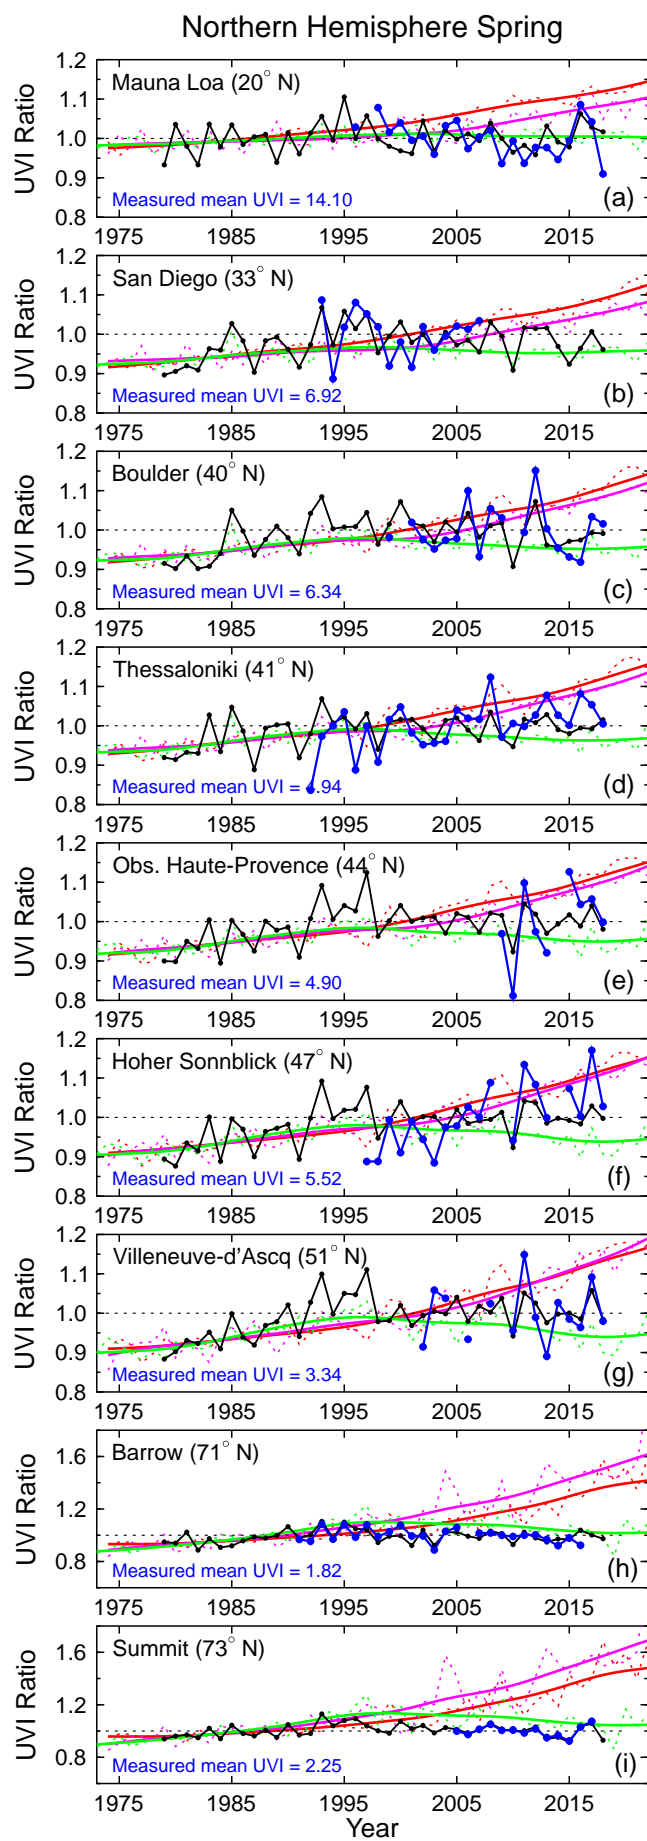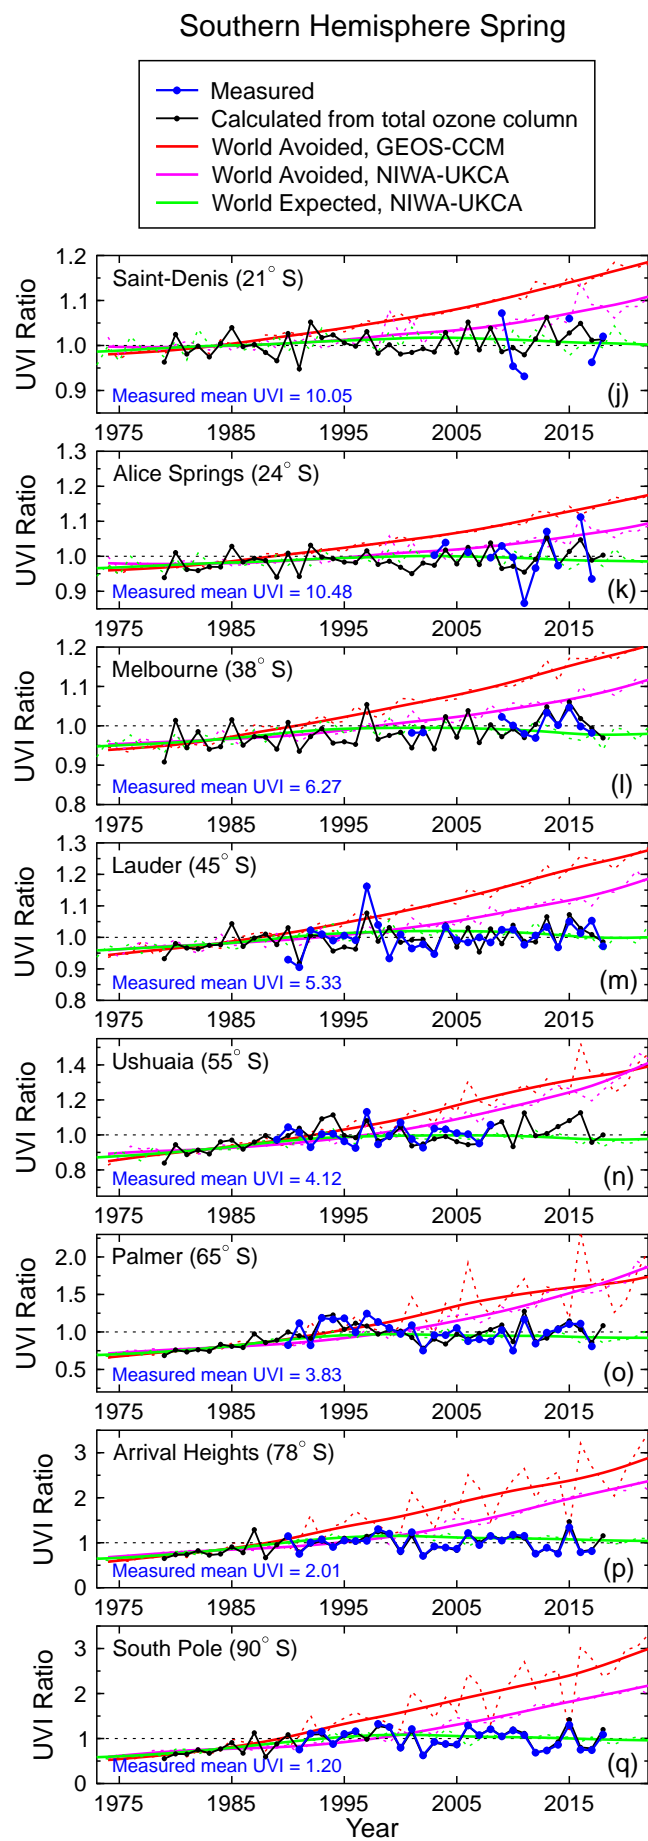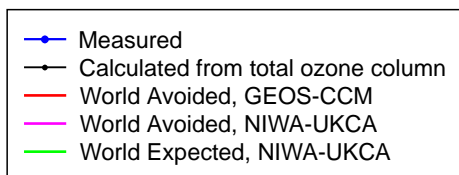



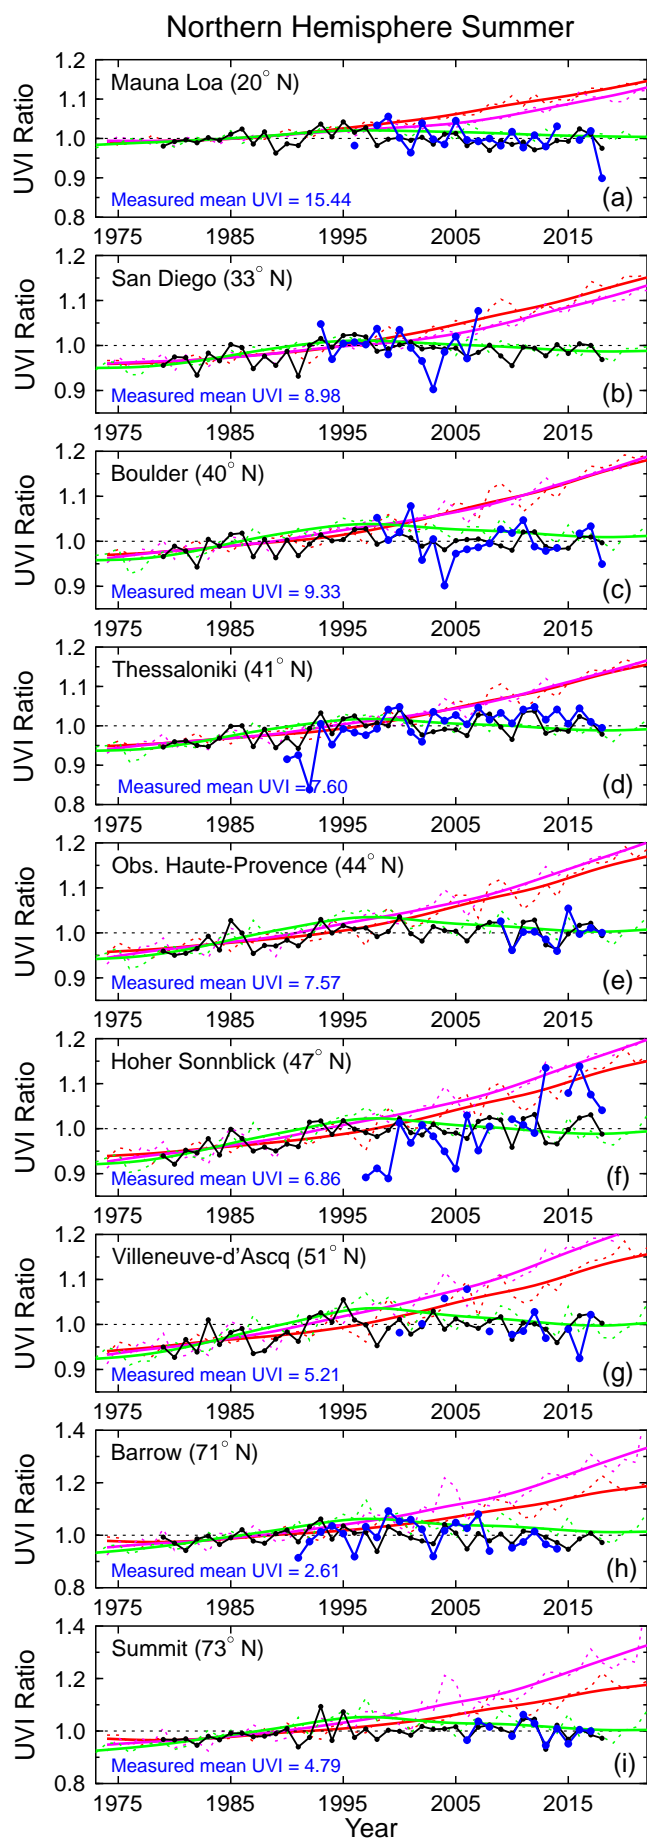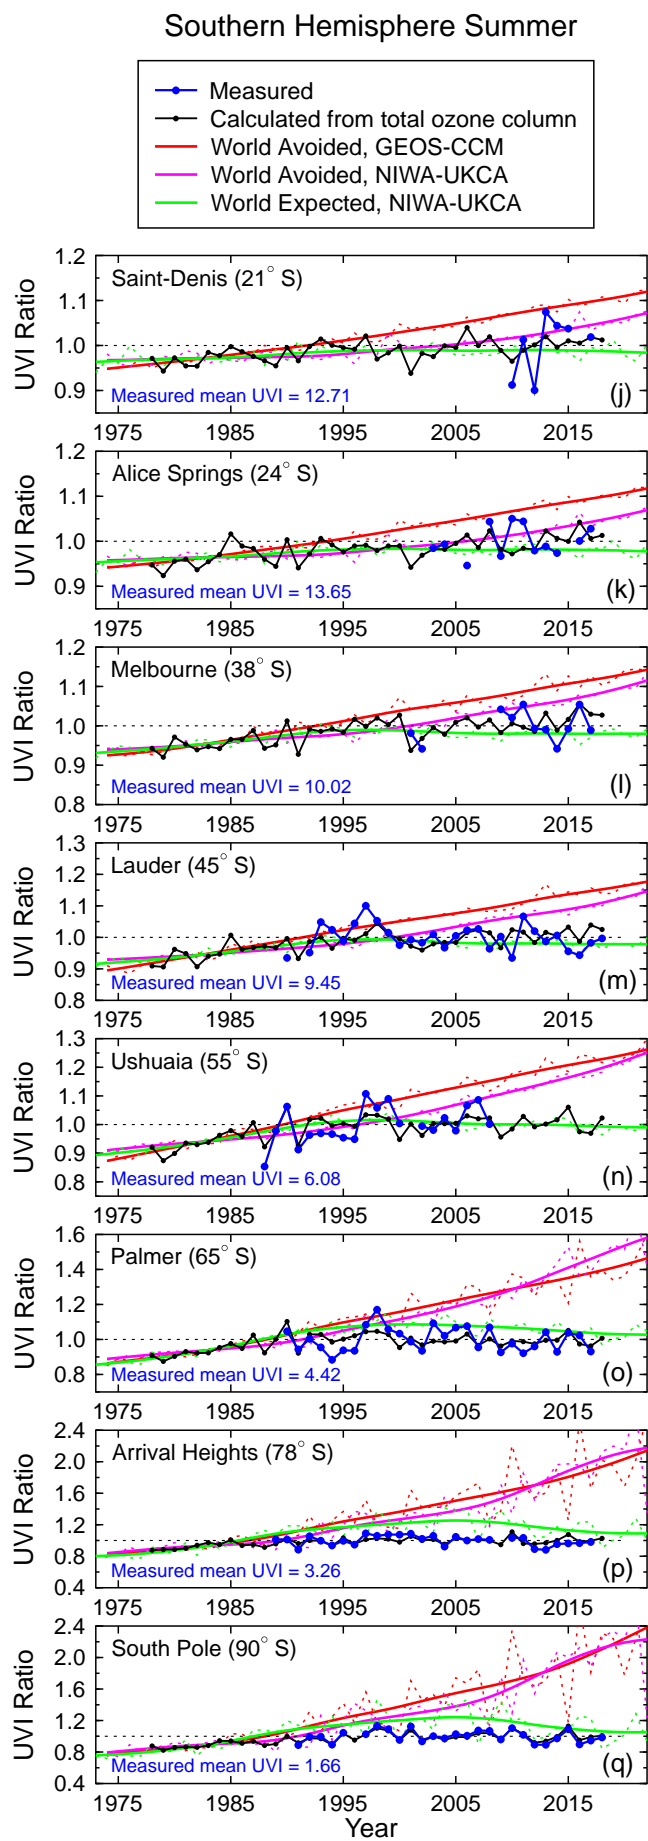

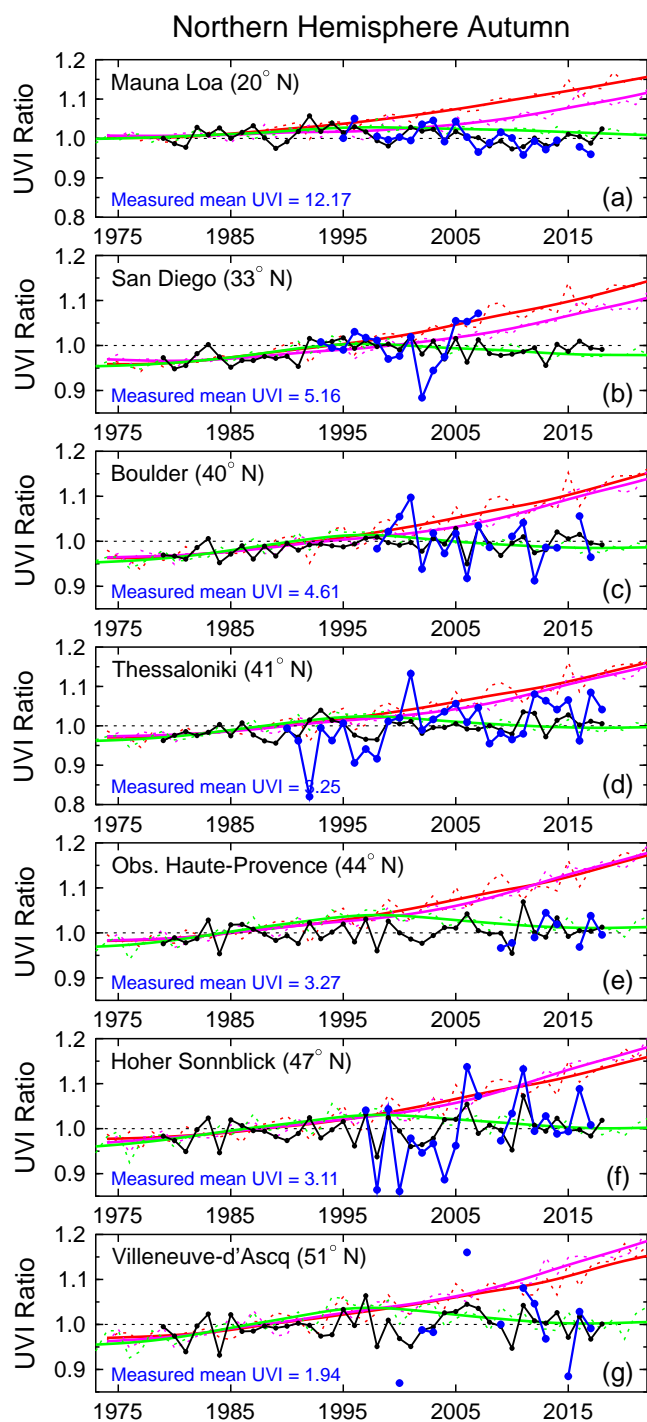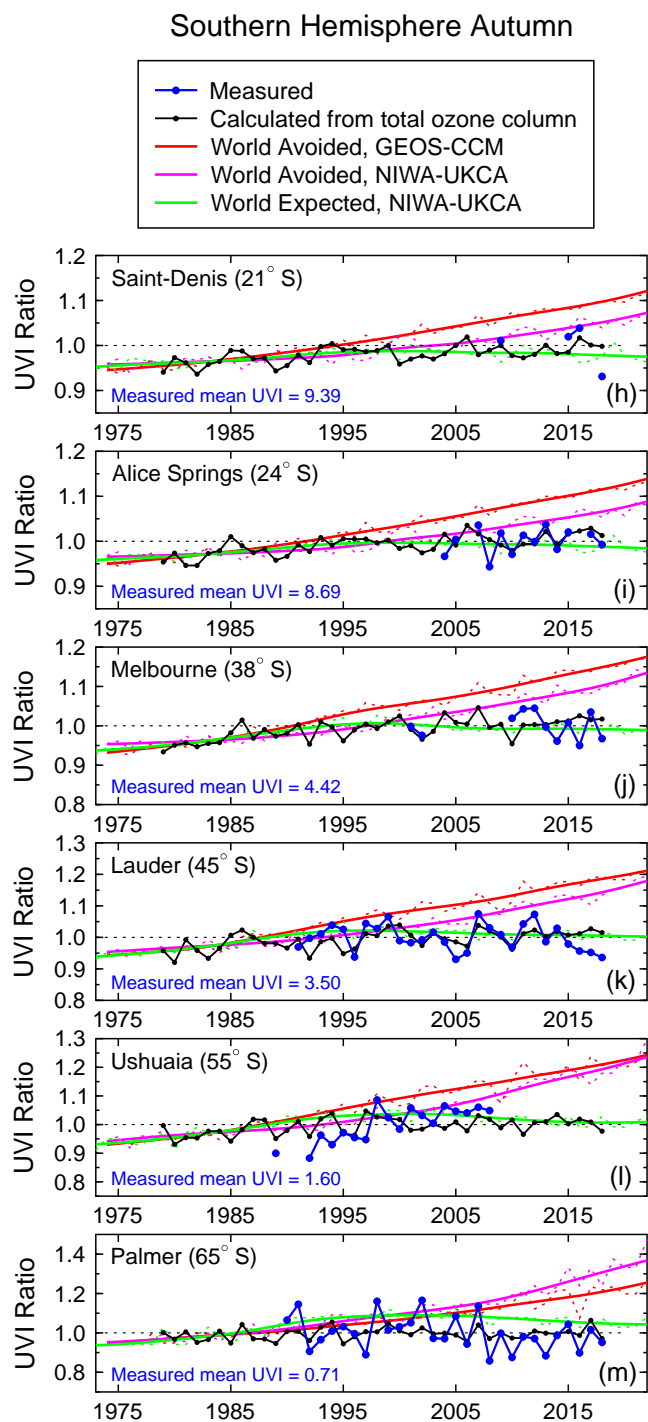

Supplement: 41598_2019_48625_MOESM1_ESM.pdf [file 41598_2019_48625_MOESM1_ESM.pdf]
